# Supplementary material for: The PI3K/AKT/mTOR interactive pathway
Source: Royal Society of Chemistry journal article supplement (doi:10.1039/c5mb00101c), 2015-04-20
Supplement: c5mb00101c2.xlsx [file c5mb00101c2.xlsx]

## Sheet: Interaction_Edges
Source Name	Source Gene ID	Target Name	Target Gene ID	Interaction Type	Interaction Effect	Phosphorylation Site	PMID	Reference
14-3-3	7534	PI3K	5290; 5291; 5293; 5294; 5295; 5296	activation	protein-protein binding		21743495	Neal CL, 2012
4E-BP1	1978	eIF4E	1977	inhibition	protein-protein binding		11691836; 19339977	Gingras AC, 2001; Ma XM, 2009
acinus	22985	Apoptosis		regulation
AKT	207; 208; 10000	14-3-3	7534	interaction	Phosphorylation	Ser-58	11956222	Powell DW, 2002
AKT	207; 208; 10000	acinus	22985	inhibition	Phosphorylation	Ser-422, Ser-573	16177823	Hu Y, 2005
AKT	207; 208; 10000	ASK1	4217	inhibition	Phosphorylation	Ser-83	11154276	Kim AH, 2001
AKT	207; 208; 10000	Bad	572	inhibition	Phosphorylation	Ser-136	9346240	Datta SR, 1997
AKT	207; 208; 10000	Bcl-10	8915	activation	Phosphorylation	Ser-218, Ser-231	16280327	Yeh PY, 2006
AKT	207; 208; 10000	Beclin-1	8678	inhibition	Phosphorylation	Ser-259	23112296	Wang RC, 2012
AKT	207; 208; 10000	Beta-catenin	1499	activation	Phosphorylation	Ser-552	17287208	Fang D, 2007
AKT	207; 208; 10000	Bim	10018	inhibition	Phosphorylation	Ser-87	16282323	Qi XJ, 2006
AKT	207; 208; 10000	BRCA1	672	activation	Phosphorylation	Ser-694, Thr-509	20085797; 10542266	Nelson AC, 2010; Altiok S, 1999
AKT	207; 208; 10000	Caspase-9	842	inhibition	Phosphorylation	Ser-196	9812896	Cardone MH; 1998
AKT	207; 208; 10000	CDK2/CycA	1017	activation	Phosphorylation	Thr-39	18354084	Maddika S, 2008
AKT	207; 208; 10000	Chk1	1111	inhibition	Phosphorylation	Ser-280	15107605	King FW, 2004
AKT	207; 208; 10000	CK II alpha	1457	activation	Phosphorylation		24297901	Nguyen le XT, 2013
AKT	207; 208; 10000	CREB	1385	activation	Phosphorylation	Ser-133	9829964	Du K, 1998
AKT	207; 208; 10000	DNMT1	1786	activation	Phosphorylation	Ser-143	21151116	Estève PO, 2011
AKT	207; 208; 10000	eNOS	4846	activation	Phosphorylation	Ser-1177	10376602; 10376603; 10469573	Fulton D, 1999; Dimmeler S, 1999; Michell BJ, 1999
AKT	207; 208; 10000	EZH2	2146	inhibition	Phosphorylation	Ser-21	16224021	Cha TL, 2005
AKT	207; 208; 10000	FOXA2	3170	inhibition	Phosphorylation	Thr-156	14500912	Wolfrum C, 2003
AKT	207; 208; 10000	FOXO	4303; 2309; 2308	inhibition	Phosphorylation	Ser-197, Ser-262, Thr-32, Ser-253, Thr-24, Ser-256, Ser-319	10217147; 16272144; 10783894; 10102273; 10358075; 15668399	Kops GJ, 1999; Matsuzaki H, 2005; Medema RH, 2000; Brunet A, 1999; Rena G, 1999; Huang H, 2005
AKT	207; 208; 10000	Girdin	55704	activation	Phosphorylation	Ser-1416	16139227	Enomoto A, 2005
AKT	207; 208; 10000	GSK-3 beta	2932	inhibition	Phosphorylation	Ser-9	8524413; 8250835	Cross DA, 1995; Sutherland C, 1993
AKT	207; 208; 10000	HSF1	3297	activation	Phosphorylation	Ser-326	24469056	Carpenter RL, 2014
AKT	207; 208; 10000	HSP27	3315	interaction	Phosphorylation	Ser-82	12740362	Rane MJ, 2003
AKT	207; 208; 10000	IKK-alpha	1147	activation	Phosphorylation	Thr-23	12048203; 10485710; 18515365; 19609947	Yuan ZQ, 2002; Ozes ON, 1999; Cahill CM, 2008; Bai D, 2009
AKT	207; 208; 10000	IMPDH	3614; 3615	activation	Phosphorylation		10930578	Ingley E, 2000
AKT	207; 208; 10000	INSIG2	51141	inhibition			21723501	Yecies JL, 2011
AKT	207; 208; 10000	IRS1	3667	activation	Phosphorylation	Ser-629	17640984	Luo M, 2007
AKT	207; 208; 10000	MDM2	4193	activation	Phosphorylation	Ser-166, Ser-186, Ser-188	15527798; 11923280	Milne D, 2004; Ogawara Y, 2002
AKT	207; 208; 10000	MST-1	6789	inhibition	Phosphorylation	Thr-120	19940129	Yuan Z, 2010
AKT	207; 208; 10000	MST-2	6788	inhibition	Phosphorylation	Thr-117, Thr-384	20231902; 20086174	Kim D, 2010; Romano D,2010
AKT	207; 208; 10000	NEDD4-2	23327	inhibition	Phosphorylation	Ser-342, Ser-428	17715136	Lee IH, 2007
AKT	207; 208; 10000	NHE1	6548	inhibition	Phosphorylation	S648, S703, S796	19622752; 18757828	Meima ME, 2009; Snabaitis AK, 2008
AKT	207; 208; 10000	p21CIP1	1026	inhibition	Phosphorylation	Thr-145, Ser-146	11463845; 11231573; 11756412	Rössig L, 2001; Zhou BP, 2001; Li Y, 2002
AKT	207; 208; 10000	p27KIP1	1027	inhibition	Phosphorylation	Thr-157, Thr-198, Ser-10	12244301; 12244302; 12042314	Shin I, 2002; Liang J, 2002; Fujita N, 2002
AKT	207; 208; 10000	p300	2033	activation	Phosphorylation	Ser-1834	16024795	Huang WC, 2005
AKT	207; 208; 10000	PAK-1	5058	activation	Phosphorylation	Ser-21	14585966	Zhou GL, 2003
AKT	207; 208; 10000	PDCD4	27250	inhibition	Phosphorylation	Ser-67, Ser-457	16357133	Palamarchuk A, 2005
AKT	207; 208; 10000	PFKFB2	5208	activation	Phosphorylation	Ser-483	23457334; 12853467	Novellasdemunt L, 2013; Pozuelo Rubio M, 2003
AKT	207; 208; 10000	PGC-1alpha	10891	inhibition	Phosphorylation	Ser-570	17554339	Li X, 2007
AKT	207; 208; 10000	PRAS40	84335	inhibition	Phosphorylation	Thr-246	12524439; 17277771; 17386266	Kovacina KS, 2003; Vander Haar E, 2007; Sancak Y, 2007
AKT	207; 208; 10000	RAF	5894	inhibition	Phosphorylation	Ser-259	10576742; 12048182	Zimmermann S, 1999; Moelling K, 2002
AKT	207; 208; 10000	RAF	673	inhibition	Phosphorylation	Ser-364, Ser-428, Ser-445, Thr-439	10869359; 23701950	Guan KL, 2000; Hong SK, 2013
AKT	207; 208; 10000	RAR-alpha	5914	inhibition	Phosphorylation	Ser-96	16417524	Srinivas H, 2006
AKT	207; 208; 10000	SCF/Skp2	6500; 6502; 8454	activation	Phosphorylation	Ser-72	19270695; 19270694	Gao D, 2009; Lin HK, 2009
AKT	207; 208; 10000	SIK2	23235	activation		Ser-358	17805301	Dentin R, 2007
AKT	207; 208; 10000	SMAD3/4	4088; 4089	inhibition	protein-protein binding		15104092; 15048128	Conery AR, 2004; Remy I, 2004
AKT	207; 208; 10000	Tal1	6886	inhibition	Phosphorylation	Thr-90	15930267	Palamarchuk A, 2005
AKT	207; 208; 10000	TERT	7015	activation	Phosphorylation	Ser-227	10224060; 22366458	Kang SS, 1999; Chung J, 2012
AKT	207; 208; 10000	TSC2	7249	inhibition	Phosphorylation		12172553; 12172554; 12934098	Inoki K, 2002; Potter CJ,2002; Mulloy R, 2003
AKT	207; 208; 10000	Twist	7291	activation	Phosphorylation	Ser-42	20400976	Vichalkovski A, 2010
AKT	207; 208; 10000	USP4	7375	activation	Phosphorylation		22706160	Zhang L, 2012
AKT	207; 208; 10000	Vimentin	7431	activation	Phosphorylation	Ser-39	20856200	Zhu QS, 2000
AKT	207; 208; 10000	Wee1	7465	inhibition	Phosphorylation	Ser-642	15964826	Katayama K, 2005
AKT	207; 208; 10000	WNK1	65125	activation	Phosphorylation	Thr-60	14611643; 15799971	Vitari AC, 2004; Jiang ZY 2005
AKT	207; 208; 10000	XIAP	331	activation		Ser-87	14645242	Dan HC, 2004
AKT	207; 208; 10000	YAP1	10413	inhibition	Phosphorylation	Ser-127	12535517	Basu S, 2003
AMPK	5562; 5564; 5563; 5565; 5571; 51422	FOXO	2309	activation	Phosphorylation		17711846	Greer EL, 2007
AMPK	5562; 5564; 5563; 5565; 5571; 51422	MTORC1	2475; 57521	inhibition	Phosphorylation	Ser-722, Ser-792	18439900	Gwinn DM, 2008
AMPK	5562; 5564; 5563; 5565; 5571; 51422	p53	7157	activation	Phosphorylation	Ser-15	23589839	Nieminen AI, 2013
AMPK	5562; 5564; 5563; 5565; 5571; 51422	SREBP1	6720	inhibition	Phosphorylation	Ser-372	21459323	Li Y, 2011
AMPK	5562; 5564; 5563; 5565; 5571; 51422	TIF-IA	54700	inhibition	Phosphorylation	Ser-635	19815529	Hoppe S, 2009
AMPK	5562; 5564; 5563; 5565; 5571; 51422	TSC2	7249	activation	Phosphorylation		14651849	Inoki K, 2003
AMPK	5562; 5564; 5563; 5565; 5571; 51422	Ulk1	8408	activation	Phosphorylation	Ser-317, Ser-777	21258367	Kim J, 2011
ANG-2	285	Angiogenesis		regulation
APC/CDH1	324; 999	PTEN	5728	inhibition	ubiquitination		24811168	Choi BH, 2014
APC/CDH1	324; 999	SCF/Skp2	6500; 6502; 8454	inhibition	ubiquitination		15014502; 15014503	Bashir T, 2004; Wei W, 2004
ASK1	4217	Apoptosis		regulation
ATM	472	BRCA1	672	activation	Phosphorylation	Ser-1423, Ser-1387	12183412; 10866324	Xu B, 2002; Gatei M, 2000
ATM	472	Chk2	11200	activation	Phosphorylation	Thr-68	11085506	Ahn JY, 2000
ATM	472	MDM2	4193	inhibition	Phosphorylation		10611322	Khosravi R, 1000
ATM	472	TRF1	7013	inhibition	Phosphorylation	Ser-367	22266654	McKerlie M, 2012
ATR	545	ATRIP	84126	activation	protein-protein binding		11721054; 16027118	Cortez D, 2001; Ball HL, 2005
ATR	545	Chk1	1111	activation	Phosphorylation	Ser-345; Ser-317	10859164; 11390642	Liu Q, 2000; Zhao H, 2001
ATRIP	84126	BRCA1	672	activation	protein-protein binding		17616665	Venere M, 2007
Axin-1	8312	Beta-catenin	1499	inhibition	protein-protein binding		10023673	Kishida M, 1999
Bad	572	Bcl-2	596	inhibition	protein-protein binding		7834748	Yang E, 1995
Bad	572	Bcl-xL	598	inhibition	protein-protein binding		7834748; 9305851; 9372935	Yang E, 1995; Zha J,1997; Kelekar A, 1997
Bax	581	Apoptosis		regulation
Bcl-10	8915	Cell survival		regulation
Bcl-2	596	Bax	581	inhibition	protein-protein binding		8358790; 8183370	Oltvai ZN, 1993; Yin XM, 1994
Bcl-2	596	Bim	10018	inhibition	protein-protein binding		9430630	O'Connor L, 1998
Bcl-xL	598	Cell survival		regulation
Beclin-1	8678	VPS34	5289	activation	protein-protein binding		23685627	Russell RC, 2013
Beta-catenin	1499	Cyclin D1	595	activation	Transcription		10201372	Tetsu O, 1999
Bim	10018	Apoptosis		regulation
Bmi1	648	Regulation of gene expression		regulation
BRCA1	672	p53	7157	activation	protein-protein binding		9482880; 9582019	Ouchi T, 1998; Zhang H, 1998
BRCA1	672	RAD51	5888	activation	protein-protein binding		10197592; 9008167	Chen JJ, 1999; Scully R, 1997
c-Jun	3725	Regulation of gene expression		regulation
Calcineurin	5530; 5534	NFAT	4772; 4773	activation	De-phosphorylation		9072970; 10089876	Beals CR, 1997; Crabtree GR, 1999
CAMKK	84254; 10645	AKT	207; 208; 10000	activation	Phosphorylation		9859994	Yano S, 1998
Caspase-3/7	836; 840	Apoptosis		regulation
Caspase-8	841	Caspase-3/7	836; 840	activation			21183080	Verbrugge I, 2010
Caspase-9	842	Caspase-3/7	836; 840	activation			21183080	Verbrugge I, 2010
CD40	958	TRAF6	7189	interaction	protein-protein binding		11406619; 12140561; 17917059	Arron JR 2001; Ye H 2002; Hostager BS, 2007
Cdc25	995	Cell cycle progression		regulation
CDK1/CycA	983; 8900; 890	Rb	5925	activation	Phosphorylation		10499802	Harbour JW, 1999
CDK1/CycB	983; 891	Cell cycle progression		regulation
CDK2/CycA	1017; 8900; 890	AKT	207; 208; 10000	activation	Phosphorylation	Ser-477, Thr-479	24670654	Liu P, 2014
CDK2/CycA	1017; 8900; 890	Axin-1	8312	activation	Phosphorylation		15063782	Kim SI, 2004
CDK2/CycA	1017; 8900; 890	Rb	5925	inhibition	Phosphorylation		10499802	Harbour JW, 1999
CDK2/CycE	1017; 898	Rb	5925	inhibition	Phosphorylation		10499802	Harbour JW, 1999
CDK3/CycC	1018; 892	Rb	5925	inhibition	Phosphorylation	Ser-807, Ser-811	15084261	Ren S, 2004
CDK4,6/CycD	1019; 1021; 595; 894	Rb	5925	inhibition	Phosphorylation		10499802	Harbour JW, 1999
CDK5	1020	p27KIP1	1027	activation	Phosphorylation		16341208	Kawauchi T, 2006
CENP-C	1060	Genetic Stability		regulation
Chk1	1111	Cdc25	995	inhibition	Phosphorylation	Ser-216	9278511	Sanchez Y, 1997
Chk1	1111	p53	7157	activation	Phosphorylation	Ser-20	10673501	Shieh SY, 2000
Chk2	11200	p53	7157	activation	Phosphorylation	Ser-20	10710310; 9843217; 9733515; 9733514	Hirao A, 2000; Khanna KK, 1998; Canman CE, 1998; Banin S, 1998
CK II alpha	1457	CKIP-1	51177	interaction	protein-protein binding		10799509	Bosc DG, 2000
CK II alpha	1457	PTEN	5728	inhibition	Phosphorylation	Ser-370, Ser-385	11035045; 16107342	Torres J, 2001; Al-Khouri AM, 2005
CK II alpha	1457	TIF-IA	54700	activation	Phosphorylation		24297901	Nguyen le XT, 2013
CKIP-1	51177	AKT	207; 208; 10000	inhibition	protein-protein binding		17942896	Tokuda E, 2007
CREB	1385	Regulation of gene expression		regulation
Cyclin D1	595	Cell cycle progression		regulation
CytokineR	3598; 3597; 3563; 3581; 3561; 3560; 53833; 3559; 3575; 58985; 53832; 3594; 116379; 3570; 3595; 3590; 3572; 3566; 3568; 3587; 3588; 3601; 163702; 50615; 149233; 3459; 3454; 3455; 3460; 2690; 3953; 9180; 2057; 1439; 1438; 1441; 1271; 3563	JAK	3716; 3717; 3718	activation	Phosphorylation		8343951; 7716810; 11345192	Witthuhn BA, 1993; Ihle JN, 1995; Leonard WJ, 2001
DEPTOR	64798	MTORC1	2475; 57521	inhibition	protein-protein binding		19446321	Peterson TR, 2009
DEPTOR	64798	MTORC2	2475; 253260	inhibition	protein-protein binding		19446321	Peterson TR, 2009
Dia1	1729	Actin cytoskeleton		regulation
DNA-PK	5591	AKT	207; 208; 10000	activation			15262962; 18439899	Feng J, 2004; Bozulic L, 2008
DNA-PK	5591	p53	7157	activation	Phosphorylation	Ser-15, Ser-37	1406679; 9363941	Lees-Miller SP, 1992; Shieh SY, 1997
DNMT1	1786	Epigenetic regulation		regulation
Dvl	1855	GSK-3 beta	2932	inhibition			16959574	Inoki K, 2006
E-cadherin	999	APC/CDH1	324; 999	interaction
E-cadherin	999	Metastasis		regulation
E2F	1869; 1870; 1871; 1874	Cell cycle progression		regulation
eEF-2	1938	Protein synthesis		regulation
eEF-2K	29904	eEF-2	1938	inhibition			11500364; 19339977	Wang X, 2001; Ma XM, 2009
EGR-1	1958	PTEN	5728	activation	Transcription		11781575	Virolle T, 2001
eIF-2B	1967; 8892; 8891; 8890; 8893	Protein synthesis		regulation
eIF-4A	1973; 1974; 9775	Protein synthesis		regulation
eIF-4B	1975	eIF-4A	1973; 1974; 9775	activation	protein-protein binding		21113024; 19339977	Nielsen KH, 2011; Ma XM, 2009
eIF4E	1977	Protein synthesis		regulation
ENaC	6337; 6338; 6339; 6340	Ion transport		regulation
eNOS	4846	Ras	3845; 3265; 4893	activation	nitrosylation		18344980	Lim KH, 2008
EPHA2	1969	Ras	3845; 3265; 4893	inhibition			16098464; 18059341	Macrae M, 2005; Menges CW, 2008
ERK	5594; 5595	Bad	572	inhibition	Phosphorylation	Ser-112	10521512	Scheid MP, 1999
ERK	5594; 5595	Bim	10018	inhibition	Phosphorylation	Ser-69	14555991	Luciano F, 2003
ERK	5594; 5595	EPHA2	1969	activation	Transcription		16098464	Macrae M, 2005
ERK	5594; 5595	GSK-3 beta	2932	inhibition	Phosphorylation	Thr-43	16039586	Ding Q, 2005
ERK	5594; 5595	NFAT	4772; 4773	inhibition	Phosphorylation	Ser-172	10652349	Porter CM, 2000
ERK	5594; 5595	p90-RSK	6195; 6196; 6197	activation	Phosphorylation		15342917	Roux PP, 2004
ERK	5594; 5595	PKM	5315	activation	Phosphorylation	Ser-37	23178880	Yang W, 2012
ERK	5594; 5595	TFEB	7942	activation	Phosphorylation		21617040	Settembre C, 2011
ERK	5594; 5595	TSC2	7249	inhibition	Phosphorylation		15851026	Ma L, 2005
EZH2	2146	DNMT1	1786	activation	protein-protein binding		16357870	Viré E, 2006
FADD	8772	Caspase-8	841	activation	protein-protein binding		21183080	Verbrugge I, 2010
FADD	8772	TRAF2	7186	interaction	protein-protein binding		8565075	Hsu H, 1996
FAK	5747	PI3K	5290; 5291; 5293; 5294; 5295; 5296	activation	protein-protein binding		7937853; 8824286	Chen HC, 1994; Chen HC, 1996
FAS	355	JNK	5599	activation			9215629	Yang X, 1997
FOXA2	3170	Regulation of gene expression		regulation
FOXO	2309	ATM	472	activation	Transcription		18424439	Yalcin S, 2008
FOXO	4303	Bim	10018	activation	Transcription		15824087	Urbich C, 2005
FOXO	2308; 2309; 4303	Cyclin D1	595; 894	inhibition	Transcription		12150827	Ramaswamy S, 2002
FOXO	2308	G6Pase	2538	activation	Transcription		17627282	Sekine K, 2007
FOXO	2309	GADD45	1647; 4616; 10912	activation	Transcription		11964479	Tran H, 2002
FOXO	2309	MnSOD	6648	activation	Transcription		12239572	Kops GJ, 2002
FOXO	2308; 2309; 4303	p15INK4B	1030	activation	Transcription		17873901	Katayama K, 2008
FOXO	2308; 2309; 4303	p21CIP1	1026	activation	Transcription		15084259	Seoane J, 2004
FOXO	4303	p27KIP1	1027	activation	Transcription		10783894	Medema RH, 2000
FOXO	2308	PEPCK	5106	activation	Transcription		17627282	Sekine K, 2007
FOXO	2308	SREBP1	6720	inhibition	Transcription		22511764	Deng X, 2012
FOXO	2308; 2309	TRAIL	8743	activation	Transcription		12351634	Modur V, 2002
FOXO	2309	TSC1	7248	activation	Transcription		20371605	Khatri S, 2010
Frizzled	8321; 2535; 7976; 8322; 7855; 8323; 8324; 8325; 8326; 11211	Dvl	1855	activation			16959574	Inoki K, 2006
G6Pase	2538	Metabolism		regulation
GADD45	1647; 4616; 10912	CDK1/CycB	983; 891	inhibition			10362260; 12483522	Zhan Q, 1999; Jin S, 2002
GADD45	1647; 4616; 10912	PCNA	5111	activation	protein-protein binding		7973727	Smith ML, 1994
Girdin	55704	Metastasis		regulation
GPCR	1902; 23566; 2846; 57121; 9170; 10161; 1128; 1129; 2149	PI3K	5291	activation	protein-protein binding		23211529; 18594509; 18544649; 10766839	Dbouk HA, 2012; Jia S, 2008; Guillermet-Guibert J, 2008; Murga C, 2000;
GPCR	1902; 23566; 2846; 57121; 9170; 10161; 1128; 1129; 2149	Rac1	5879	activation	protein-protein binding		23706742	Fritsch R, 2013
GRB10	2887	IRS1	3667	inhibition	Phosphorylation		21659604; 12493740; 14615605	Hsu PP, 2011; Wick KR, 2003; Langlais P, 2004
GSK-3 beta	2932	Beta-catenin	1499	inhibition	Phosphorylation		9482734; 9601641	Ikeda S, 1998; Hart MJ, 1998
GSK-3 beta	2932	CKIP-1	51177	inhibition	Phosphorylation	Ser-342	24777252	Zhang L, 2014
GSK-3 beta	2932	Cyclin D1	595	inhibition	Phosphorylation	Thr-286	9832503	Diehl JA, 1998
GSK-3 beta	2932	eIF-2B	1967; 8892; 8891; 8890; 8893	inhibition	Phosphorylation	Ser-540	9468292	Welsh GI, 1998
GSK-3 beta	2932	Myc	4609	inhibition	Phosphorylation	Thr-58	14563837	Gregory MA, 2003
GSK-3 beta	2932	NFAT	4772; 4773	inhibition	Phosphorylation		9072970; 19258413	Beals CR, 1997; Yoeli-Lerner M, 2009
GSK-3 beta	2932	NFKB	4790; 5970	inhibition	Phosphorylation		11425860	Demarchi F, 2001
GSK-3 beta	2932	p21CIP1	1026	inhibition	Phosphorylation		17283049	Lee JY, 2007
GSK-3 beta	2932	PTEN	5728	inhibition	Phosphorylation	Ser-362, Thr-366	16107342	Al-Khouri AM, 2005
GSK-3 beta	2932	Snail	6615	inhibition	Transcription		15631989; 15448698	Bachelder RE, 2003; Zhou BP, 2004
GSK-3 beta	2932	TSC2	7249	activation	Phosphorylation		16959574	Inoki K, 2006
HIF-1-alpha	3091	ANG-2	285	activation	Transcription		18720385	Simon MP, 2008
HIF-1-alpha	3091	PAI-1	5054	activation	Transcription		17197388	Liao H, 2007
HIF-1-alpha	3091	PKM	5315	activation	Transcription		21620138	Luo W, 2011
HIF-1-alpha	3091	Twist	7291	activation	Transcription		18635960; 18297062	Yang MH, 2008; Yang MH, 2008
HIF-1-alpha	3091	VEGF	7422; 7423	activation	Transcription		1279431; 9393757	Shweiki D, 1992; Jiang BH, 1997
histone H1	3024; 3009; 3006; 3007; 3008	Regulation of gene expression		regulation
histone H3	3020; 3021; 440093; 8353; 126961; 333932;653604; 8350; 8351; 8352; 8353; 8354; 8355; 8356; 8357; 8968; 8290; 8358	Regulation of gene expression		regulation
HNF4-alpha	3172	Lipin-1	23175	activation	Transcription		23236470	Chen Z, 2012
HSF1	3297	Slug	6591	activation	Transcription		24469056	Carpenter RL, 2014
HSP27	3315	AKT	207; 208; 10000	activation	protein-protein binding		12740362; 17510053	Rane MJ, 2003; Wu R, 2007
HSP90	3320; 3326	AKT	207; 208; 10000	activation	protein-protein binding		10995457	Sato S, 2000
IkB-alpha	4792	NFKB	4790; 5970	inhibition			16056267	Chen ZJ., 2005
IKK-beta	3551	ASK1	4217	inhibition	Phosphorylation	Ser-967	23530055	Puckett MC, 2013
IKK-beta	3551	FOXO	2309	inhibition	Phosphorylation	Ser-644	15084260	Hu MC, 2004
IKK-beta	3551	IkB-alpha	4792	inhibition	Phosphorylation	Ser-19, Ser-23	9252186; 9346484; 9346241	DiDonato JA, 1997; Mercurio F, 1997; Zandi E, 1997
IKK-beta	3551	MTORC2	2475; 253260	activation	protein-protein binding		23872070	Xu Y, 2013
IKK-beta	3551	TSC1	7248	inhibition	Phosphorylation	Ser-487, Ser-511	17693255	Lee DF, 2007
ILK	3611	AKT	207; 208; 10000	activation	protein-protein binding		11313365	Persad S, 2001
ILK	3611	Paxillin	5829	interaction	protein-protein binding		11313365; 11304546	Persad S, 2001; Nikolopoulos SN, 2001
IMPDH	3614; 3615	GTP biosynthesis		regulation
INSIG2	51141	SREBP1	6720	inhibition			21723501	Yecies JL, 2011
IP6K	9677	AKT	207; 208; 10000	inhibition	protein-protein binding		21145457	Chakraborty A, 2010
ITCH	83737	Dvl	1855	inhibition	protein-protein binding		22826439	Wei W, 2012
ITCH	83737	p73	7161	inhibition	protein-protein binding		15678106	Rossi M, 2005
JAK	3716; 3717; 3718	PI3K	5290; 5291; 5293; 5294; 5295; 5296	activation			7716810; 11345192	Ihle JN, 1995; Leonard WJ, 2001
JAK	3716; 3717; 3718	STAT3	6774	activation			7716810; 11345192	Ihle JN, 1995; Leonard WJ, 2001
JNK	5599	ATF-2	1386	activation			7824938	Gupta S, 1995
JNK	5599	Beta-catenin	1499	inhibition	Phosphorylation	Ser-37, Thr-41	19667122	Lee MH, 2009
JNK	5599	c-Jun	3725	activation		Ser-63, Ser-73, Thr-91, Thr-93	12853483	Weiss C, 2003
JNK	5599	FOXO	4303	activation	Phosphorylation	Thr-447, Thr-451	15538382	Essers MA, 2004
JNK	5599	NFAT	4772; 4773	inhibition	Phosphorylation	Ser-172	10652349; 9374467	Porter CM, 2000; Chow CW, 1997
JNK	5599	TIF-IA	54700	inhibition	Phosphorylation	Thr-200	15805466	Mayer C, 2005
JNK	5599	YAP1	10413	activation	Phosphorylation		21364637	Tomlinson V, 2010
KCC	6560; 9990; 10723	Ion transport		regulation
LATS1	9113	YAP1	10413	inhibition	Phosphorylation	Ser-127	18640976	Oka T, 2008
LIMK	3984; 3985	Actin cytoskeleton		regulation
Lipin-1	23175	PPARα	5465	activation			16950137	Finck BN, 2006
LKB1	6794	AMPK	5562; 5564; 5563; 5565; 5571; 51422	activation	Phosphorylation	Thr-172	14985505	Shaw RJ, 2004
MAF1	84232	RNA Pol III	11128; 55703	inhibition	protein-protein binding		20887893	Vannini A, 2010
MDM2	4193	NFAT	4772; 4773	inhibition	ubiquitination		16307918	Yoeli-Lerner M, 2005
MDM2	4193	p53	7157	inhibition	protein-protein binding		8479525; 8289798	Oliner JD, 1993; Haines DS, 1994
MEK	5604; 5605	ERK	5594; 5595	activation	Phosphorylation		1411546	Crews CM, 1992
MEKK3	4215	IKK-beta	3551	activation	Phosphorylation		11429546	Yang J, 2001
miR-200	406983; 406984	Bmi1	648	inhibition	Transcription		21336307	Chang CJ, 2011
miR-200	406983; 406984	Zeb1	6935	inhibition	Transcription		21336307; 18411277; 21518799; 18376396	Chang CJ, 2011; Korpal M, 2008; Kim T, 2011; Gregory PA, 2008
miR-200	406983; 406984	Zeb2	9839	inhibition	Transcription		18411277; 21518799; 18376396	Korpal M, 2008; Kim T, 2011; Gregory PA, 2008
miR-9	407046	E-cadherin	999	inhibition	Transcription		20173740	Ma L, 2000
Miz-1	7709	p15INK4B	1030	activation	Transcription		11283613	Staller P, 2001
MnSOD	6648	Metabolism		regulation
Mre11-Rad50-Nbs1	4361; 4362; 10111; 4683	ATM	472	activation			15064416; 15790808	Lee JH, 2004; Lee JH, 2005
MST-1	6789	FOXO	2308; 2309; 4303	activation	Phosphorylation		16751106	Lehtinen MK, 2006
MST-2	6788	LATS1	9113	interaction	protein-protein binding		17889669	Matallanas D, 2007
MTORC1	2475; 57521	4E-BP1	1978	inhibition	Phosphorylation	Thr-37, Thr-46	12172553; 10364159	Inoki K, 2002; Gingras AC, 1999
MTORC1	2475; 57521	GRB10	2887	activation			21659604	Hsu PP, 2011
MTORC1	2475; 57521	HIF-1-alpha	3091	activation			12242281; 17502379	Hudson CC, 2002; Land SC, 2007
MTORC1	2475; 57521	Lipin-1	23175	inhibition	Phosphorylation		11792863; 21816276	Huffman TA, 2002; Peterson TR, 2011
MTORC1	2475; 57521	MAF1	84232	inhibition	Phosphorylation	Ser-75	20543138; 19574957; 20516213	Kantidakis T, 2010; Wei Y, 2009; Michels AA, 2010
MTORC1	2475; 57521	p62	8878	activation	protein-protein binding		21981924	Duran A, 2011
MTORC1	2475; 57521	p70-S6K	6198; 6199	activation	Phosphorylation	Thr-389	16286006; 12172553	Holz MK, 2005; Inoki K, 2002
MTORC1	2475; 57521	PKM	5315	activation			21325052	Sun Q, 2011
MTORC1	2475; 57521	PP2A	5515; 5516; 5518; 5519	inhibition			10200280	Peterson RT, 1999
MTORC1	2475; 57521	RhoA	387	activation			21430067; 15467718	Gulhati P, 2011; Jacinto E, 2004
MTORC1	2475; 57521	SREBP1	6720	activation			18762023; 21816276	Porstmann T, 2008; Peterson TR, 2011
MTORC1	2475; 57521	STAT3	6774	activation	Phosphorylation	Ser-727	10660304	Yokogami K, 2000
MTORC1	2475; 57521	TFEB	7942	activation	Phosphorylation		21804531	Peña-Llopis S, 2011
MTORC1	2475; 57521	TIF-IA	54700	activation			15004009	Mayer C, 2004
MTORC1	2475; 57521	Ulk1	8408	inhibition	Phosphorylation	Ser-757	21258367	Kim J, 2011
MTORC1	2475; 57521	Ulk1	8408	inhibition	Phosphorylation		19690328; 19225151; 19258318; 19211835	Chan EY, 2009; Jung CH, 2009; Ganley IG, 2009; Hosokawa N, 2009
MTORC1	2475; 57521	YY1	7528	activation	protein-protein binding		18046414	Cunningham JT, 2007
MTORC2	2475; 253260	AKT	207; 208; 10000	activation	Phosphorylation	Ser-473	15718470	Sarbassov DD, 2005
MTORC2	2475; 253260	OXSR1	9943	activation	Phosphorylation	Ser-339	24191005	Sengupta S, 2013
MTORC2	2475; 253260	PKC	5578; 5579	activation	Phosphorylation	Ser-657	24375676	Li X, 2014
MTORC2	2475; 253260	RhoA	387	activation			21430067; 15467718	Gulhati P, 2011; Jacinto E, 2004
MTORC2	2475; 253260	SGK	6446;10110; 23678	activation	Phosphorylation	Ser-422	18925875	García-Martínez JM, 2008
Myc	4609	CDK4,6/CycD	1019	activation	Transcription		10688915	Hermeking H, 2000
Myc	4609	Cyclin D1	595	activation	Transcription		10508165	Bouchard C, 1999
Myc	4609	miR-9	407046	activation	Transcription		20173740	Ma L, 2000
Myc	4609	Miz-1	7709	inhibition	protein-protein binding		11283613; 11283614	Staller P, 2001; Seoane J, 2001
Myc	4609	p15INK4B	1030	inhibition	Transcription		11804592	Feng XH, 2002
Myc	4609	p21CIP1	1026	inhibition	Transcription		12384701	Seoane J, 2002
Myc	4609	p27KIP1	1027	inhibition	Transcription		11313917; 10508165	Yang W, 2001; Bouchard C, 1999
Myc	4609	TSC2	7249	inhibition	Transcription		18056446	Ravitz MJ, 2007
MYLK	340156; 4638; 85366; 91807	Actin cytoskeleton		regulation
N-cadherin	1000	Metastasis		regulation
NEDD4-1	4734	AKT	207; 208; 10000	inhibition	ubiquitination		23195959	Fan CD, 2013
NEDD4-1	4734	PTEN	5728	inhibition	ubiquitination		17218260	Wang X, 2007
NEDD4-2	23327	ENaC	6337; 6338; 6339; 6340	inhibition	protein-protein binding		17502380; 11742982; 11696533	Zhou R, 2007; Debonneville C, 2001; Snyder PM, 2002
NEDD4-2	23327	SGK	6446;10110; 23678	inhibition	ubiquitination		15576372	Zhou R, 2005
NFAT	4772; 4773	Regulation of gene expression		regulation
NFKB	4790; 5970	Bcl-10	8915	activation	Transcription		16280327	Yeh PY, 2006
NFKB	4790; 5970	IkB-alpha	4792	activation	Transcription		8096091; 8460169	Sun SC, 1993; Brown K, 1993
NFKB	4790; 5970	JNK	5599	inhibition			12048203	Yuan ZQ, 2002
NFKB	4790; 5970	Snail	6615	activation	Transcription		15286702	Barberà MJ, 2004
NHE1	6548	Actin cytoskeleton		regulation
NIK	9448	IKK-beta	3551	activation	Phosphorylation	Ser-176	9520446	Ling L, 1998
NKCC	6558; 6557	Ion transport		regulation
Notch	4851; 4853; 4854; 4855	Slug	6591	activation	Transcription		17984306	Leong KG, 2007
Noxa	5366	Apoptosis		regulation
OXSR1	9943	KCC	6560; 9990; 10723	inhibition	Phosphorylation		16275911; 17182532; 19665974; 24393035	Kahle KT, 2005; Garzón-Muvdi T, 2007; Rinehart J, 2009; de Los Heros P, 2014
OXSR1	9943	NKCC	6558; 6557	activation	Phosphorylation		12386165; 16263722	Piechotta K, 2002; Moriguchi T, 2005
p14ARF	1029	MDM2	4193	inhibition	protein-protein binding		9724636; 9529249; 10801444	Stott FJ, 1998; Zhang Y, 1998; Lohrum MA, 2000
p15INK4B	1030	CDK4,6/CycD	1019; 1021; 595; 894	inhibition	protein-protein binding		9042862	Reynisdóttir I, 1997
p16INK4a	1029	CDK4,6/CycD	1019; 1021; 595; 894	inhibition	protein-protein binding		9751050	Russo AA, 1998
p21CIP1	1026	CDK1/CycA	983; 8900; 890	inhibition	protein-protein binding		17942597	Satyanarayana A, 2008
p21CIP1	1026	CDK2/CycA	1017; 8900; 890	inhibition	protein-protein binding		8242751; 8668341; 8979268; 8259214	Harper JW, 1993; Fotedar R, 1996; Moskowitz NK, 1996; Xiong Y, 1993
p21CIP1	1026	CDK2/CycE	1017; 898	inhibition	protein-protein binding		8242751; 8668341; 8979268; 8259214	Harper JW, 1993; Fotedar R, 1996; Moskowitz NK, 1996; Xiong Y, 1993
p21CIP1	1026	CDK4,6/CycD	1019; 1021; 595; 894	inhibition	protein-protein binding		8242751; 8259214	Harper JW, 1993; Xiong Y, 1993
p21CIP1	1026	PCNA	5111	inhibition	protein-protein binding		7753174; 7911228; 7935768	Luo Y, 1995; Waga S, 1994
p27KIP1	1027	CDK2/CycA	1017; 8900; 890	inhibition	protein-protein binding		8033213; 10393546	Toyoshima H, 1994; Xu X, 1999
p27KIP1	1027	CDK2/CycE	1017; 898	inhibition	protein-protein binding		8033213; 10393546	Toyoshima H, 1994; Xu X, 1999
p27KIP1	1027	CDK4,6/CycD	1019; 1021; 595; 894	inhibition	protein-protein binding		8033213	Toyoshima H, 1994
p300	2033	Epigenetic regulation		regulation
p38 MAPK	1432	Bim	10018	activation	Phosphorylation	Ser-65	16818494	Cai B, 2006
p38 MAPK	1432	GSK-3 beta	2932	inhibition	Phosphorylation		18451303	Thornton TM, 2008
p38 MAPK	1432	NFAT	4772; 4773	inhibition	Phosphorylation	Ser-172	10652349	Porter CM, 2000
p53	7157	Bcl-2	596	inhibition	Transcription		8183579	Miyashita T, 1994
p53	7157	FAS	355	activation	Transcription		7539102; 9765154	Owen-Schaub LB, 1995; Bennett M, 1998
p53	7157	GADD45	1647; 4616; 10912	activation	Transcription		7798274; 1423616	Carrier F, 1994; Kastan MB, 1992
p53	7157	MDM2	4193	activation	Transcription		8440237	Barak Y, 1993
p53	7157	miR-200	406983; 406984	activation	Transcription		21336307	Chang CJ, 2011
p53	7157	Noxa	5366	activation	Transcription		10807576	Oda E, 2000
p53	7157	p21CIP1	1026	activation	Transcription		7913544; 8242752	Li Y, 1994; el-Deiry WS, 1993
p53	7157	PCNA	5111	activation	Transcription		7915517	Jackson P, 1994
p53	7157	PHLDA3	23612	activation	Transcription		19203586	Kawase T, 2009
p53	7157	PTEN	5728	activation	Transcription		11545734	Stambolic V, 2001
p53	7157	PUMA	27113	activation	Transcription		11463392	Nakano K, 2001
p53	7157	Sestrin	27244; 83667; 143686	activation			18692468	Budanov AV, 2008
p53	7157	Siah-1	6477	activation	Transcription		14985507; 21057505	Fiucci G, 2004; Fujita K, 2010
p53	7157	Slug	6591	inhibition	ubiquitination		19448627	Wang SP, 2009
p53	7157	THBS1	7057	activation			7521539	Dameron KM, 1994
p53	7157	TIGAR	57103	activation	Transcription		16839880	Bensaad K, 2006
p62	8878	Autophagy		regulation
p70-S6K	6198; 6199	eEF-2K	29904	inhibition			11500364; 19339977	Wang X, 2001; Ma XM, 2009
p70-S6K	6198; 6199	eIF-4B	1975	activation	Phosphorylation	Ser-422	15071500; 16286006; 16763566	Raught B, 2004; Holz MK, 2005; Shahbazian D, 2006
p70-S6K	6198; 6199	IRS1	3667	inhibition	Phosphorylation	Ser-302, Ser-1101	15249583; 17709744	Harrington LS, 2004; Tremblay F, 2007
p70-S6K	6198; 6199	Mad1	4084	inhibition	Phosphorylation	Ser-145	18451027; 19526459	Zhu J, 2008; Chou CK, 2009
p70-S6K	6198; 6199	PDCD4	27250	inhibition	Phosphorylation	Ser-67	17053147	Dorrello NV, 2006
p70-S6K	6198; 6199	RPS6	6194	activation			3257566; 19339977	Jenö P, 1998; Ma XM, 2009
p70-S6K	6198; 6199	SKAR	84271	activation			18423201	Ma XM, 2008
p73	7161	PUMA	27113	activation	Transcription		14634023	Melino G, 2004
p90-RSK	6195; 6196; 6197	Bad	572	inhibition	Phosphorylation	Ser-112	10558990	Bonni A, 1999
p90-RSK	6195; 6196; 6197	CREB	1385	activation	Phosphorylation	Ser-133	10558990	Bonni A, 1999
p90-RSK	6195; 6196; 6197	eEF-2K	29904	inhibition			11500364	Wang X, 2001
p90-RSK	6195; 6196; 6197	eIF-4B	1975	activation	Phosphorylation		16763566	Shahbazian D, 2006
p90-RSK	6195; 6196; 6197	Mad1	4084	inhibition	Phosphorylation	Ser-145	18451027; 19526459	Zhu J, 2008; Chou CK, 2009
p90-RSK	6195; 6196; 6197	TIF-IA	54700	activation	Phosphorylation	Ser-649, Ser-633	12620228	Zhao J, 2003
p90-RSK	6195; 6196; 6197	TSC2	7249	inhibition	Phosphorylation	Ser-1798	15342917	Roux PP, 2004
PAI-1	5054	Angiogenesis		regulation
PAK-1	5058	LIMK	3984; 3985	activation	Phosphorylation	Thr-508	10559936	Edwards DC, 1999
PAK-1	5058	MYLK	340156; 4638; 85366; 91807	inhibition	Phosphorylation		10092231	Sanders LC, 1999
PAK-1	5058	RAF	5894	activation	Phosphorylation	Ser-338	9823899; 10801448	King AJ, 1998; Chaudhary A, 2000
PAK-1	5058	Snail	6615	activation	Phosphorylation	Ser-246	15833848	Yang Z, 2005
Paxillin	5829	FAK	5747	interaction	protein-protein binding		11304546	Nikolopoulos SN, 2001
PCNA	5111 B140	DNA repair		regulation
PDCD4	27250	eIF-4A	1973; 1974; 9775	inhibition	protein-protein binding		18296639	Suzuki C, 2008
PDK1	5163	AKT	207; 208; 10000	activation	Phosphorylation	Thr-308	9094314; 9228007	Alessi DR, 1997; Stokoe D, 1997
PEPCK	5106	Metabolism		regulation
PFKFB2	5208	Metabolism		regulation
PGC-1alpha	10891	Metabolism		regulation
PHLDA3	23612	AKT	207; 208; 10000	inhibition			19203586	Kawase T, 2009
PHLPP1	23239	AKT	207; 208; 10000	inhibition	De-phosphorylation		15808505	Gao T, 2005
PI3K	5290; 5291; 5293; 5294; 5295; 5296	AKT	207; 208; 10000	activation			7774014	Franke TF, 1995
PI3K	5290; 5291; 5293; 5294; 5295; 5296	IRS1	3667	activation	protein-protein binding		1381348; 11438664	Hadari YR, 1992; Shaw LM, 2001
PI3K	5290; 5291; 5293; 5294; 5295; 5296	PDK1	5163	activation			2833705; 9247112	Whitman M, 1988; Cohen P, 1997
PI3K	5290; 5291; 5293; 5294; 5295; 5296	Tiam1	7074	activation			9832565; 20308428	Sander EE, 1998; Cain RJ, 2010
PI3K	5290; 5291; 5293; 5294; 5295; 5296	Vav	7409; 7410; 10451	activation			9438848	Han J, 1998
PKC	5578; 5579	IKK-beta	3551	activation	Phosphorylation	Ser-177	23123196	Yang W, 2012
PKD1	5587	Snail	6615	inhibition	Phosphorylation	Ser-11	20940406	Du C, 2010
PKM	5315	Beta-catenin	1499	activation	protein-protein binding		22056988	Yang W, 2011
PKM	5315	HIF-1-alpha	3091	activation	protein-protein binding		21620138	Luo W, 2011
PKM	5315	histone H3	3020; 3021; 440093; 8353; 126961; 333932;653604; 8350; 8351; 8352; 8353; 8354; 8355; 8356; 8357; 8968; 8290; 8358	interaction	Phosphorylation	Thr-11	22901803	Yang W, 2012
PKM	5315	PHD3	112399	activation	protein-protein binding		21620138	Luo W, 2011
PKM	5315	STAT3	6774	activation	Phosphorylation	Tyr-705	22306293	Gao X, 2012
PLK3	1263	PTEN	5728	activation	Phosphorylation		20940307	Xu D, 2010
PML	5371	MTORC1	2475; 57521	inhibition	protein-protein binding		16915281	Bernardi R, 2006
PML	5371	PP2A	5515; 5516; 5518; 5519	interaction			16680151	Trotman LC, 2006
PML	5371	YAP1	10413	activation	protein-protein binding		19111660	Lapi E, 2008
POT1	25913	ATR	545	inhibition			17687332	Denchi EL, 2007
PP2A	5515; 5516; 5518; 5519	AKT	207; 208; 10000	inhibition	De-phosphorylation		16680151	Trotman LC, 2006
PP2A	5515; 5516; 5518; 5519	p53	7157	inhibition	De-phosphorylation	Ser-46	19139122	Mi J, 2009
PP2A	5515; 5516; 5518; 5519	REDD1	54541	interaction	protein-protein binding		25056877	Dennis MD, 2014
PPARα	5465	PGC-1alpha	10891	activation	protein-protein binding		10669761	Vega RB, 2000
PRAS40	84335	MTORC1	2475; 57521	inhibition	protein-protein binding		17517883; 17510057; 17386266	Oshiro N, 2007; Wang L, 2007; Sancak Y, 2007
PTEN	5728	AKT	207; 208; 10000	inhibition			9778245	Stambolic V, 1998
PTEN	5729	APC/CDH1	324; 999	activation	protein-protein binding		21241890	Song MS, 2011
PTEN	5730	CENP-C	1060	interaction	protein-protein binding		17218262	Shen WH, 2007
PTEN	5731	histone H1	3024; 3009; 3006; 3007; 3008	interaction	protein-protein binding		25199838	Chen ZH, 2014
PTEN	5732	p53	7157	activation	protein-protein binding		12620407; 12839945; 14559824	Freeman DJ, 2003; Su JD, 2003; Zhou M, 2003
PTEN	5733	RAD51	5888	activation	Transcription		17218262	Shen WH, 2007
PUMA	27113	Apoptosis		regulation
Rac1	5879	PAK-1	5058	activation	protein-protein binding		9705280; 10790367	Knaus UG, 1998; del Pozo MA, 2000
Rac1	5879	PI3K	5291	activation	protein-protein binding		23706742	Fritsch R, 2013
RAD51	5888	DNA repair		regulation
RAF	673; 5894	MEK	5604; 5605	activation	Phosphorylation		8385802	Lange-Carter CA, 1993
RAF	5894	MST-2	6788	inhibition	protein-protein binding		15618521; 20086174	O'Neill E, 2004; Romano D,2010
Rag-Ragulator	10670; 10325; 55004; 28956; 8649; 389541; 10542	AMPK	5562; 5564; 5563; 5565; 5571; 51422	activation			25002183	Zhang CS, 2014
Rag-Ragulator	10670; 10325; 55004; 28956; 8649; 389541; 10542	MTORC1	2475; 57521	activation			20381137; 22980980	Sancak Y, 2010; Bar-Peled L, 2012
Rak	2444	PTEN	5728	activation	Phosphorylation	Tyr-336	19345329	Yim EK, 2009
RANK	8792	TRAF6	7189	interaction	protein-protein binding		10635328; 12140561	Wong BR, 1999; Ye H 2002
Ras	3845; 3265; 4893	PI3K	5290	activation	protein-protein binding		8052307; 17540175	Rodriguez-Viciana P, 1994; Gupta S, 2007
Ras	3845; 3265; 4893	RAF	673; 5894	activation	protein-protein binding		8334704; 8332195	Vojtek AB, 1993; Warne PH, 1993
Ras	3845; 3265; 4893	RASSF1	11186	interaction	protein-protein binding		10998413	Vos MD, 2000
RASSF1	11186	MST-1	6789	activation	protein-protein binding		16510573	Oh HJ, 2006
RASSF1	11186	MST-2	6788	activation	protein-protein binding		17889669; 20086174	Matallanas D, 2007; Romano D,2010
Rb	5925	E2F	1869; 1870; 1871; 1874	inhibition	protein-protein binding		1828392	Chellappan SP, 1991
REDD1	54541	TSC2	7249	activation			18198340; 15545625; 15988001	DeYoung MP, 2008; Brugarolas J, 2004; Sofer A, 2005
RFP	5987	PTEN	5728	inhibition	ubiquitination		23419514	Lee JT, 2013
Rheb	6009	MTORC1	2475; 57521	activation	protein-protein binding		12869586	Inoki K, 2003
RhoA	387	Dia1	1729	activation			10559899; 11992112	Watanabe N, 1999; Sahai E, 2002
RhoA	387	ROCK	6093; 9475	activation			10021386; 11992112	Sahai E, 1999; Sahai E, 2002
RIP	8737	TAK1	6885	activation			16260783	Blonska M, 2005
RNA Pol I	25885; 84172	Ribosomal RNA synthesis		regulation
RNA Pol III	11128; 55703	Ribosomal RNA synthesis		regulation
ROCK	6093; 9475	FAK	5747	activation	Phosphorylation	Ser-732	16760434	Le Boeuf F, 2006
ROCK	6093; 9475	JNK	5599	activation			15068801; 7600582	Marinissen MJ, 2004; Minden A, 1995
RPS6	6194	Protein synthesis		regulation
RTK	3480; 1956; 2260; 2261; 2263; 2264; 5156; 5159; 3643; 3791; 2321; 2324; 1436; 1969; 3815; 4233; 4804; 7010	PI3K	5290	activation	protein-protein binding		19629070	Engelman JA, 2009
RTK	3480; 1956; 2260; 2261; 2263; 2264; 5156; 5159; 3643; 3791; 2321; 2324; 1436; 1969; 3815; 4233; 4804; 7010	Ras	3845; 3265; 4893	activation	protein-protein binding		7893993; 19629070	Margolis B, 1994; Engelman JA, 2009
SCF/Skp2	6500; 6502; 8454	AKT	207; 208; 10000	activation	ubiquitination		22632973	Chan CH, 2012
SCF/Skp2	6500; 6502; 8454	FOXO	2308	inhibition	ubiquitination		15668399	Huang H, 2005
SCF/Skp2	6500; 6502; 8454	p27KIP1	1027	inhibition	ubiquitination		10559916	Carrano AC, 1999
Sestrin	27244; 83667; 143686	AMPK	5562; 5564; 5563; 5565; 5571; 51422	activation			18692468	Budanov AV, 2008
SGK	6446;10110; 23678	FOXO	2309	inhibition	Phosphorylation	Ser-315, Thr-32	11154281	Brunet A, 2001
SGK	6446;10110; 23678	NEDD4-2	23327	inhibition	Phosphorylation	Ser-444, Ser-338	11742982; 11696533	Debonneville C, 2001; Snyder PM, 2002
Siah-1	6477	HIPK2	28996	inhibition	ubiquitination		18536714	Winter M, 2008
Siah-1	6477	TRF2	7014	inhibition	ubiquitination		21266744; 21057505	Horikawa I, 2011; Fujita K, 2010
SIK2	23235	MTORC2	2475; 253260	inhibition		Ser-171	17805301	Dentin R, 2007
SIRT1	23411	FOXO	2309	inhibition	Deacetylation		14980222	Motta MC, 2004
SKAR	84271	Protein synthesis		regulation
Slug	6591	E-cadherin	999	inhibition	Transcription		11912130	Hajra KM, 2002
SMAD3/4	4088; 4089	Myc	4609	inhibition	Transcription		12150994; 11689553	Chen CR, 2002; Yagi K, 2002
SMAD3/4	4088; 4089	p21CIP1	1026	activation	Transcription		9618481	Moustakas A, 1998
SMAD3/4	4088; 4089	Snail	6615	activation	protein-protein binding		19597490	Vincent T, 2009
Snail	6615	E-cadherin	999	inhibition	Transcription		10655587; 10655586	Batlle E, 2000; Cano A, 2000
Src	6714	Beta-catenin	1499	activation	Phosphorylation	Tyr-333	22056988	Yang W, 2011
Src	6714	PI3K	5290; 5291; 5293; 5294; 5295; 5296	activation	protein-protein binding		10635328; 17275257	Wong BR, 1999; Arcaro A, 2007
SREBP1	6720	Metabolism		regulation
STAT3	6774	HIF-1-alpha	3091	activation			18985005; 23604114	Jung JE, 2008; Pawlus MR, 2014
STAT3	6774	MEK	5607	activation	Transcription		15378007; 22306293	Song H, 2004; Gao X, 2012
STAT3	6774	PTEN	5728	activation	Transcription		22055460	Zha X, 2011
STAT3	6774	Twist	7291	activation	Transcription		18353781	Cheng GZ, 2008
TAK1	6885	IKK-beta	3551	activation			10094049	Ninomiya-Tsuji J, 1999
Tal1	6886	Blood cell development		regulation
TBK1	29110	AKT	207; 208; 10000	activation	Phosphorylation		21329883	Ou YH, 2011
TERT	7015	Genetic Stability		regulation
TFEB	7942	V-ATPase	525; 526; 527; 9114	activation	Transcription		21804531	Peña-Llopis S, 2011
TGFbeta	7040	TGFBR1	7046	activation			1333888; 8047140	Wrana JL, 1992; Wrana JL, 1994
TGFBR1	7046	SMAD3/4	4088; 4089	activation			17708943; 9393997; 9311995	Massaous J, 1997; Heldin CH, 1997; Nakao A, 1997
THBS1	7057	Angiogenesis		regulation
Tiam1	7074	Rac1	5879	activation			12134164	Lambert JM, 2001
TIF-IA	54700	RNA Pol I	25885; 84172	activation	protein-protein binding		9932453	Grummt I, 1999
TIGAR	57103	Metabolism		regulation
TNF-R	7132	FADD	8772	interaction	protein-protein binding		10753878	Hu WH, 2000
TNF-R	7132	TRADD	8717	interaction	protein-protein binding		10911999; 8565075	Tsao DH, 2000; Hsu H, 1996
TRADD	8717	Caspase-8	841	activation	protein-protein binding		21183080	Verbrugge I, 2010
TRADD	8717	RIP	8737	interaction	protein-protein binding		8612133	Hsu H, 1996
TRADD	8717	TRAF2	7186	interaction	protein-protein binding		8565075; 10892748; 10911999	Hsu H, 1996; Park YC, 2000; Tsao DH, 2000
TRAF2	7186	NIK	9448	activation	protein-protein binding		9020361	Malinin NL, 1997
TRAF2	7186	TRAF6	7189	interaction	protein-protein binding		16260598	Davies CC, 2005
TRAF6	7189	AKT	207; 208; 10000	activation	ubiquitination		19713527; 20081374	Yang WL, 2009; Yang WL, 2010
TRAF6	7189	Src	6714	activation	protein-protein binding		10635328	Wong BR, 1999
TRAIL	8743	Apoptosis		regulation
TRF1	7013	Genetic Stability		regulation
TRF2	7014	ATM	472	inhibition	protein-protein binding		17687332; 15314656	Denchi EL, 2007; Karlseder J, 2004
TRIB3	57761	AKT	207; 208; 10000	inhibition	protein-protein binding		12791994	Du K, 2003
TSC1	7248	TSC2	7249	interaction	protein-protein binding		9580671; 11175345	van Slegtenhorst M, 1998; Benvenuto G, 2000
TSC2	7249	Rheb	6009	inhibition	protein-protein binding		12869586	Inoki K, 2003
Twist	7291	AKT	208	activation	Transcription		17332325	Cheng GZ, 2007
Twist	7291	Bmi1	648	activation	Transcription		20818389	Yang MH, 2010
Twist	7291	E-cadherin	999	inhibition	Transcription		18062917	Vesuna F, 2008
Twist	7291	N-cadherin	1000	activation	Transcription		22166980; 22332917	Ng YH, 2012; Hao L, 2012
Twist	7291	p53	7157	inhibition	protein-protein binding		22975381; 18504427	Piccinin S, 2012; Shiota M, 2008
Ulk1	8408	Beclin-1	8678	activation	Phosphorylation	Ser-14	23685627	Russell RC, 2013
USP4	7375	TGFBR1	7046	activation	de-ubiquitination		22706160	Zhang L, 2012
Vav	7409; 7410; 10451	Rac1	5879	activation			8990121	Crespo P, 1997
VEGF	7422; 7423	Angiogenesis		regulation
VHL	7428	HIF-1-alpha	3091	inhibition	ubiquitination		10353251; 10823831	Maxwell PH, 1999; Cockman ME, 2000
Vimentin	7431	Metastasis		regulation
VPS34	5289	Autophagy		regulation
Wee1	7465	Cell cycle progression		regulation
Wip1	8493	ATM	472	inhibition	De-phosphorylation	Ser-1981	16949371	Shreeram S, 2006
WNK1	65125	OXSR1	9943	activation	Phosphorylation		16263722	Moriguchi T, 2005
WNK1	65125	SGK	6446;10110; 23678	activation	protein-protein binding		16006511	Xu BE, 2005
Wnt	7471; 7472; 7473; 54361	Frizzled	8321; 2535; 7976; 8322; 7855; 8323; 8324; 8325; 8326; 11211	activation	protein-protein binding		8717036; 8939578	Bhanot P, 1996; Yang-Snyder J, 1996
WWP2	11060	PTEN	5728	inhibition	ubiquitination		21532586	Maddika S, 2011
XIAP	331	Caspase-3/7	836; 840	inhibition			21183080	Verbrugge I, 2010
XIAP	331	Caspase-9	842	inhibition			21183080	Verbrugge I, 2010
YAP1	10413	p73	7161	activation	protein-protein binding		11278685; 17110958	Strano S, 2001; Levy D, 2007
YAP1	10413	PML	5371	activation	Transcription		19111660	Lapi E, 2008
YY1	7528	Metabolism		regulation
Zeb1	6935	Metastasis		regulation
Zeb2	9839	E-cadherin	999	inhibition	Transcription		11430829	Comijn J, 2001

## Sheet: Protein_Nodes
Gene Name	Node Gene ID	Gene Symbol	Protein Name	Description	Cellular Localization	Molecular Function	PDB	SwissProt	EC number
acinus	22985	ACIN1	acinus	apoptotic chromatin condensation inducer 1	cytoplasm	protein		Q9UKV3
AKT	207; 208; 10000	AKT	Akt1, Akt2, Akt3	v-akt murine thymoma viral oncogene homolog	cytoplasm	kinase	4GV1; 4EJN; 2X18; 1UNQ; 1P6S; 1O6L	P31749; P31751; Q9Y243	2.7.11.1
PRAS40	84335	AKT1S1	PRAS40	AKT1 substrate 1 (proline-rich)	cytoplasm	protein		Q96B36
ANG-2	285	ANGPT2	ANG-2	angiopoietin 2	extracellular	protein	1Z3S;1Z3U;2GY7;4JZC	O15123
APC/CDH1	324; 999	APC, CDH1	APC, E-cadherin	E-cadherin	nucleus	protein	4G69; 3RL7; 3RL8; 3NMW; 3NMZ; 2RQU; 3L6X; 3L6Y; 2O72; 2OMZ; 1V18; 1T08; 1TH1; 1M5I; 1JPP; 1DEB; 1EMU	P25054; P12830
ATF-2	1386	ATF2	ATF-2	activating transcription factor 2	cytoplasm	transcription factor	1BHI;1T2K;4H36	P15336	2.3.1.48
ATM	472	ATM	ATM	Serine-protein kinase ATM (Ataxia telangiectasia mutated) (A-T, mutated); ataxia telangiectasia mutated	nucleus	kinase		Q13315	2.7.11.1
V-ATPase	525; 526; 527; 9114	ATP6V1B1, ATP6V1B2, ATP6V0C, ATP6V0D1	ATP6V1B1, ATP6V1B2, ATP6V0C, ATP6V0D1		cytoplasm	protein		P15313; P21281; P27449; P61421
ATR	545	ATR	ATR	ataxia telangiectasia and Rad3 related; similar to ataxia telangiectasia and Rad3 related protein	nucleus	kinase		Q13535	2.7.11.1
ATRIP	84126	ATRIP	ATRIP	MAF1 homolog (S. cerevisiae)	nucleus	protein	4IGK;4NB3	Q8WXE1
Axin-1	8312	AXIN1	Axin-1	axin 1	cytoplasm	protein	1DK8;1EMU;1O9U;3ZDI;4B7T;4NM0;4NM3;4NM5;4NM7;4NU1	O15169
Bad	572	BAD	BAD	BCL2-associated agonist of cell death	cytoplasm	protein	1G5J	Q92934
Bax	581	BAX	Bax	BCL2-associated X protein	cytoplasm	protein	1F16;2G5B;2K7W;2LR1;3PK1;3PL7;4BD2;4BD6;4BD7;4BD8;4BDU	Q07812
PUMA	27113	BBC3	PUMA	BCL2 binding component 3	cytoplasm	protein	2M04;4BPI;4BPJ;4BPK;4HNJ	Q9BXH1
Bcl-10	8915	BCL10	Bcl-10	B-cell CLL/lymphoma 10; hypothetical LOC646626	cytoplasm	protein	2MB9	O95999
Bcl-2	596	BCL2	Bcl-2	B-cell CLL/lymphoma 2	cytoplasm	protein	1G5M;1GJH;1YSW;2O21;2O22;2O2F;2W3L;2XA0;4AQ3;4IEH;4LVT;4LXD;4MAN	P10415
Bcl-xL	598	BCL2L1	Bcl-xL	BCL2-like 1	cytoplasm	protein	1BXL;1G5J;1LXL;1MAZ;1R2D;1R2E;1R2G;1R2H;1R2I;1YSG;1YSI;1YSN;2B48;2LP8;2LPC;2M03;2M04;2ME8;2ME9;2MEJ;2O1Y;2O2M;2O2N;2P1L;2PON;2YJ1;2YQ6;2YQ7;2YXJ;3CVA;3FDL;3FDM;3INQ;3IO8;3PL7;3QKD;3R85;3SP7;3SPF;3WIZ;3ZK6;3ZLN;3ZLO;3ZLR;4A1U;4A1W;4AQ3;4BPK;4C52;4C5D;4CIN;4EHR;4HNJ;4IEH;4TUH	Q07817
Bim	10018	BCL2L11	Bim	BCL2-like 11 (apoptosis facilitator)	cytoplasm	protein	1F95;2K7W;2NL9;2V6Q;2VM6;2WH6;2YQ6;3D7V;3FDL;3IO8;3IO9;3KJ0;3KJ1;3KJ2;4B4S;4D2M	O43521
Beclin-1	8678	BECN1	Beclin-1	beclin 1, autophagy related	cytoplasm	protein	2P1L;2PON;3DVU;4DDP;4MI8	Q14457
Bmi1	648	BMI1	Bmi1	BMI1 polycomb ring finger oncogene	cytoplasm	protein	2H0D;3RPG;4R8P	P35226
RAF	673; 5894	BRAF, RAF1	B-Raf, Raf-1	raf murine leukemia viral oncogene homolog	cytoplasm	kinase	4IEA; 4FJ3; 3O8I; 3OG7; 3NKX; 3OMV; 3IQJ; 3IQU; 3IQV; 3NY5; 3KUC; 3CU8; 1FAQ	P15056; P04049	2.7.11.1
BRCA1	672	BRCA1	BRCA1	breast cancer 1, early onset	nucleus	transcription regulator	1JM7;1JNX;1N5O;1OQA;1T15;1T29;1T2U;1T2V;1Y98;2ING;3COJ;3K0H;3K0K;3K15;3K16;3PXA;3PXB;3PXC;3PXD;3PXE;4IFI;4IGK;4JLU	P38398	6.3.2.-
TIGAR	57103	C12orf5	TIGAR	TP53-Induced Glycolysis And Apoptosis Regulator	cytoplasm	protein	3DCY	Q9NQ88	3.1.3.46
CAMKK	84254; 10645	CAMKK1, CAMKK2	CaMKK	alcium/calmodulin-dependent protein kinase kinase	cytoplasm	kinase	2ZV2	Q8N5S9; Q96RR4	2.7.11.17
Caspase-3/7	836; 840	CASP3, CASP7	Caspase-3, Caspase-7	caspase, apoptosis-related cysteine peptidase	cytoplasm	protein	4QTX; 4QTY; 4QU0; 4QU5; 4QU8; 4QU9; 4QUA; 4QUB; 4QUD; 4QUE; 4QUG; 4QUH; 4QUI; 4QUJ; 4QUL; 4LSZ; 4HQ0; 4HQR; 4JB8; 4JJ8; 4JJE; 4JQY; 4JQZ	P42574; P55210	3.4.22.56
Caspase-8	841	CASP8	Caspase-8	caspase, apoptosis-related cysteine peptidase	cytoplasm	protein	1F9E;1I4E;1QDU;1QTN;2C2Z;2FUN;2K7Z;2Y1L;3H11;3KJN;3KJQ;4JJ7	Q14790	3.4.22.61
Caspase-9	842	CASP9	Caspase-9	caspase, apoptosis-related cysteine peptidase	cytoplasm	protein	1JXQ;1NW9;2AR9;3D9T;3V3K;3YGS;4RHW	P55211	3.4.22.62
Girdin	55704	CCDC88A	Girdin	coiled-coil domain containing 88A	cytoplasm	protein		Q3V6T2
Cyclin D1	595	CCND1	Cyclin D1	cyclin D1	cytoplasm	protein	2W96;2W99;2W9F;2W9Z	P24385
CD40	958	CD40	CD40	CD40 molecule, TNF receptor superfamily member 5	plasma membrane	signaling receptor	1CDF;1CZZ;1D00;1FLL;1LB6;3QD6	P25942
Cdc25	995	CDC25C	Cdc25C	cell division cycle 25 homolog C (S. pombe)	cytoplasm	phosphatase	2OJX;3BZI;3OP3	P30307	3.1.3.48
E-cadherin	999	CDH1	E-cadherin	cadherin 1, type 1, E-cadherin (epithelial)	plasma membrane	protein	1O6S;2O72;2OMT;2OMU;2OMV;2OMX;2OMY;2OMZ;3FF7;3FF8;3L6X;3L6Y	P12830
N-cadherin	1000	CDH2	N-cadherin	cadherin 2, type 1, N-cadherin (neuronal)	plasma membrane	protein		P19022
CDK1/CycA	983; 8900; 890	CDK1, CCNA1, CCNA2	CDK1/CycA	cyclin-dependent protein kinase holoenzyme complex	nucleus	kinase	4CFU; 4CFV; 4BCM; 4BCN; 2CCH	P06493; P78396; P20248
CDK1/CycB	983; 891	CDK1, CCNB1	CDK1/CycB	cyclin-dependent protein kinase holoenzyme complex	nucleus	kinase	2JGZ; 2B9R	P06493; P14635	2.7.11.22; 2.7.11.23
CDK2/CycA	1017	CDK2, CCNA1, CCNA2	CDK2/CycA	cyclin-dependent protein kinase holoenzyme complex	nucleus	kinase	1AQ1;1B38;1B39;1BUH;1CKP;1DI8;1DM2;1E1V;1E1X;1E9H;1F5Q;1FIN;1FQ1;1FVT;1FVV;1G5S;1GIH;1GII;1GIJ;1GY3;1GZ8;1H00;1H01;1H07;1H08;1H0V;1H0W;1H1P;1H1Q;1H1R;1H1S;1H24;1H25;1H26;1H27;1H28;1HCK;1HCL;1JST;1JSU;1JSV;1JVP;1KE5;1KE6;1KE7;1KE8;1KE9;1OGU;1OI9;1OIQ;1OIR;1OIT;1OIU;1OIY;1OKV;1OKW;1OL1;1OL2;1P2A;1P5E;1PF8;1PKD;1PW2;1PXI;1PXJ;1PXK;1PXL;1PXM;1PXN;1PXO;1PXP;1PYE;1QMZ;1R78;1URC;1URW;1V1K;1VYW;1VYZ;1W0X…	P24941
CDK2/CycE	1017; 898	CDK2, CCNE1	CDK2/CycE	cyclin-dependent protein kinase holoenzyme complex	nucleus	kinase	4FKL; 4EOI; 4EOJ; 4EOM; 4EOP; 2IW8; 2IW9; 1W98; 1OIT; 1GII	P24941; P24864	2.7.11.22
CDK3/CycC	1018; 892	CDK3, CCNC	CDK3/CycC	cyclin-dependent protein kinase holoenzyme complex	nucleus	kinase	4F6U	Q00526; P24863	2.7.11.22
CDK4,6/CycD	1019; 1021; 595; 894	CDK4, CDK6, CCND1, CCND2	CDK4,6/CycD	cyclin-dependent protein kinase holoenzyme complex	nucleus	kinase	2W96; 2W9F; 2W9Z; 3G33; 1BLX	P11802; Q00534; P24385; P30279	2.7.11.22
CDK5	1020	CDK5	CDK5	cyclin-dependent protein kinase	nucleus	kinase	1H4L;1LFR;1UNG;1UNH;1UNL;3O0G;4AU8	Q00535	2.7.11.1
p21CIP1	1026	CDKN1A	p21	cyclin-dependent kinase inhibitor 1A (p21, Cip1)	nucleus	protein	1AXC;2ZVV;2ZVW	P38936
p27KIP1	1027	CDKN1B	p27	cyclin-dependent kinase inhibitor 1B (p27, Kip1)	nucleus	protein	1H27;1JSU;2AST	P46527
p14ARF	1029	CDKN2A	p14ARF	cyclin-dependent kinase inhibitor 2A	nucleus	protein		Q8N726
p16INK4a	1029	CDKN2A	p16INK4A	cyclin-dependent kinase inhibitor 2A (melanoma, p16, inhibits CDK4)	nucleus	protein		Q8N726
p15INK4B	1030	CDKN2B	p15INK4B	cyclin-dependent kinase inhibitor 2B (p15, inhibits CDK4)	nucleus	protein		P42772
CENP-C	1060	CENPC	CENP-C	centromere protein C 1	nucleus	protein		Q03188
Chk1	1111	CHEK1	Chk1	checkpoint kinase 1	nucleus	kinase	1IA8;1NVQ;1NVR;1NVS;1ZLT;1ZYS;2AYP;2BR1;2BRB;2BRG;2BRH;2BRM;2BRN;2BRO;2C3J;2C3K;2C3L;2CGU;2CGV;2CGW;2CGX;2E9N;2E9O;2E9P;2E9U;2E9V;2GDO;2GHG;2HOG;2HXL;2HXQ;2HY0;2QHM;2QHN;2R0U;2WMQ;2WMR;2WMS;2WMT;2WMU;2WMV;2WMW;2WMX;2X8D;2X8E;2X8I;2XEY;2XEZ;2XF0;2YDI;2YDJ;2YDK;2YER;2YEX;2YM3;2YM4;2YM5;2YM6;2YM7;2YM8;2YWP;3F9N;3JVR;3JVS;3NLB;3OT3;3OT8;3PA3;3PA4;3PA5;3TKH;3TKI;3U9N;4FSM;4FSN;4FSQ;4FSR;4FST;4FSU;4FSW…	O14757	2.7.11.1
Chk2	11200	CHEK2	Chk2	checkpoint kinase 2	nucleus	kinase	1GXC;2CN5;2CN8;2W0J;2W7X;2WTC;2WTD;2WTI;2WTJ;2XBJ;2XK9;2XM8;2XM9;2YCF;2YCQ;2YCR;2YCS;2YIQ;2YIR;2YIT;3I6U;3I6W;3VA4;4A9R;4A9S;4A9T;4A9U;4BDA;4BDB;4BDC;4BDD;4BDE;4BDF;4BDG;4BDH;4BDI;4BDJ;4BDK	O96017	2.7.11.1
IKK-alpha	1147	CHUK	IKK-alpha	conserved helix-loop-helix ubiquitous kinase	cytoplasm	kinase	3BRT	O15111	2.7.11.10
CREB	1385	CREB1	CREB1	cAMP responsive element binding protein 1	nucleus	transcription factor	2LXT	P16220
CK II alpha	1457	CSNK2A1	CK II alpha	casein kinase 2	nucleus	kinase	1JWH;1NA7;1PJK;2PVR;2ZJW;3AMY;3AT2;3AT3;3AT4;3AXW;3BQC;3C13;3FWQ;3H30;3JUH;3MB6;3MB7;3NGA;3NSZ;3OWJ;3OWK;3OWL;3PE1;3PE2;3PE4;3Q04;3Q9W;3Q9X;3Q9Y;3Q9Z;3QA0;3R0T;3RPS;3TAX;3U4U;3U87;3U9C;3W8L;3WAR;3WIK;3WIL;4BXA;4BXB;4DGL;4FBX;4GRB;4GUB;4GYW;4GYY;4GZ3;4IB5;4KWP;4MD7;4MD8;4MD9;4NH1	P68400	2.7.11.1
Beta-catenin	1499	CTNNB1	Beta-catenin	catenin (cadherin-associated protein), beta 1, 88kDa	cytoplasm	transcription regulator	1G3J;1JDH;1JPW;1LUJ;1P22;1QZ7;1T08;1TH1;2G57;2GL7;2Z6H;3DIW;3FQN;3FQR;3SL9;3SLA;3TX7;4DJS	P35222
REDD1	54541	DDIT4	REDD1	DNA-Damage-Inducible Transcript 4	cytoplasm	protein	3LQ9	Q9NX09
DEPTOR	64798	DEPTOR	DEPTOR	WNK lysine deficient protein kinase 1	cytoplasm	kinase		Q8TB45
Dia1	1729	DIAPH1	Dia1	Diaphanous-Related Formin 1	cytoplasm	protein		O60610
DNMT1	1786	DNMT1	DNMT1	DNA (cytosine-5-)-methyltransferase 1	nucleus	protein	3EPZ;3PTA;3SWR	P26358	2.1.1.37
Dvl	1855	DVL1	DVL-1	dishevelled, dsh homolog 1 (Drosophila); dishevelled, dsh homolog 1 (Drosophila)-like 1	cytoplasm	protein		O14640
E2F	1869; 1870; 1871; 1874	E2F1, E2F2, E2F3, E2F4	E2F1, E2F2, E2F3, E2F4	E2F transcription factor	nucleus	transcription factor	2AZE; 1O9K; 1H24; 1N4M; 1CF7	Q01094; Q14209; O00716; Q16254
eEF-2	1938	EEF2	eEF-2	eukaryotic translation elongation factor 2	cytoplasm	translation factor	3J3A	P13639
eEF-2K	29904	EEF2K	eEF-2K	eukaryotic elongation factor-2 kinase	cytoplasm	kinase		O00418	2.7.11.20
PHD3	112399	EGLN3	PHD3	Egl-9 Family Hypoxia-Inducible Factor 3	cytoplasm	protein		Q9H6Z9	1.14.11.29
EGR-1	1958	EGR1	EGR-1	early growth response 1	nucleus	transcription factor	4R2A;4R2C;4R2D	P18146
eIF-2B	1967; 8892; 8891; 8890; 8893	EIF2B1, EIF2B2, EIF2B3, EIF2B4, EIF2B5	eIF-2B	eukaryotic translation initiation factor	cytoplasm	translation factor	3JUI; 3ECS	Q14232; P49770; Q9NR50; Q9UI10; Q13144
eIF-4A	1973; 1974; 9775	EIF4A1, EIF4A2, EIF4A3	eIF-4A1, eIF-4A2, eIF-4A3	eukaryotic translation initiation factor	cytoplasm	translation factor	4C9B; 2XB2; 2ZU6; 3EX7; 3BOR; 2J0S; 2J0U; 2J0U; 2J0Q; 2HYI; 2G9N	P60842; Q14240; P38919	3.6.4.13
eIF-4B	1975	EIF4B	eIF-4B	similar to eukaryotic translation initiation factor 4H; eukaryotic translation initiation factor 4B	cytoplasm	translation factor	1WI8;2J76	P23588
eIF4E	1977	EIF4E	eIF4E	eukaryotic translation initiation factor 4E; similar to hCG1777996; similar to eukaryotic translation initiation factor 4E	cytoplasm	translation factor	1IPB;1IPC;1WKW;2GPQ;2V8W;2V8X;2V8Y;2W97;3AM7;3TF2;3U7X;4AZA;4BEA;4DT6;4DUM;4TPW;4TQB;4TQC	P06730
4E-BP1	1978	EIF4EBP1	4E-BP1	eukaryotic translation initiation factor 4E binding protein 1	cytoplasm	protein	1EJ4;1WKW;2JGB;2JGC;2V8W;2V8X;2V8Y;3HXG;3HXI;3M93;3M94;3U7X	Q13541
p300	2033	EP300	p300	Histone acetyltransferase	nucleus	transcription factor	1L3E;1P4Q;2K8F;2MH0;3BIY;3I3J;3IO2;3P57;3T92;4BHW;4PZR;4PZS;4PZT	Q09472	2.3.1.48
EPHA2	1969	EPHA2	EPHA2	EPH receptor A2	plasma membrane	kinase	1MQB;2E8N;2K9Y;2KSO;2X10;2X11;3C8X;3CZU;3FL7;3HEI;3HPN;3KKA;3MBW;3MX0;3SKJ;4P2K;4PDO;4TRL	P29317	2.7.10.1
EZH2	2146	EZH2	EZH2	enhancer of zeste homolog 2 (Drosophila)	nucleus	transcription regulator	2C6V;4MI0;4MI5	Q15910	2.1.1.43
FADD	8772	FADD	FADD	Fas (TNFRSF6)-associated via death domain	cytoplasm	protein	1A1W;1A1Z;1E3Y;1E41;2GF5;3EZQ;3OQ9	Q13158
FAS	355	FAS	FAS	Fas (TNF receptor superfamily, member 6)	plasma membrane	signaling receptor	1BZI;1DDF;3EWT;3EZQ;3THM;3TJE	P25445
FOXA2	3170	FOXA2	FOXA2	forkhead box A2	nucleus	transcription factor		Q9Y261
FOXO	2308; 2309; 4303	FOXO	FOXO1, FOXO3, FOXO4	forkhead box	nucleus	transcription factor	4LG0; 2LQH; 3L2C; 2K86; 3CO6; 3CO7; 3COA; 2UZK; 1E17	Q12778; O43524; P98177
Rak	2444	FRK	Rak	fyn-related kinase	nucleus	kinase		P42685	2.7.10.2
Frizzled	8321; 2535; 7976; 8322; 7855; 8323; 8324; 8325; 8326; 11211	FZD1, FZD2, FZD3, FZD4, FZD5, FZD6, FZD7, FZD8, FZD9, FZD10	Frizzled1, Frizzled2, Frizzled3, Frizzled4, Frizzled5, Frizzled6, Frizzled7, Frizzled8, Frizzled9, Frizzled10	Seven transmembrane spanning receptor	plasma membrane	signaling receptor		Q9UP38; Q9ULV1; O60353; O75084; Q9H461; O00144; Q14332; Q9NPG1; Q13467; Q9ULW2
G6Pase	2538	G6PC	G6Pase	glucose-6-phosphatase	cytoplasm	phosphatase		P35575	3.1.3.9
GADD45	1647; 4616; 10912	GADD45A, GADD45B, GADD45G	GADD45A, GADD45B, GADD45G	growth arrest and dna damage inducible	nucleus	protein	3FFM; 2KG4; 2WAL	P24522; O75293; O95257
GRB10	2887	GRB10	GRB10	growth factor receptor-bound protein 10	plasma membrane	protein	1NRV;3HK0	Q13322
GSK-3 beta	2932	GSK3B	GSK-3 beta	glycogen synthase kinase 3 beta	cytoplasm	kinase	1GNG;1H8F;1I09;1J1B;1J1C;1O6K;1O6L;1O9U;1PYX;1Q3D;1Q3W;1Q41;1Q4L;1Q5K;1R0E;1UV5;2JDO;2JDR;2JLD;2O5K;2OW3;2UW9;2X39;2XH5;3CQU;3CQW;3DU8;3E87;3E88;3E8D;3F7Z;3F88;3GB2;3I4B;3L1S;3M1S;3MV5;3OW4;3PUP;3Q3B;3QKK;3SAY;3SD0;3ZDI;3ZRK;3ZRL;3ZRM;4ACC;4ACD;4ACG;4ACH;4AFJ;4B7T;4DIT;4EKK;4IQ6;4J1R;4J71;4NM0;4NM3;4NM5;4NM7	P49841	2.7.11.26; 2.7.11.1
histone H3	3020; 3021; 440093; 8353; 126961; 333932;653604; 8350; 8351; 8352; 8353; 8354; 8355; 8356; 8357; 8968; 8290; 8358	H3F3A, H3F3B, H3F3C, HIST1H3E, HIST2H3C, HIST2H3A, HIST2H3D, HIST1H3A, HIST1H3D, HIST1H3C, HIST1H3E, HIST1H3I, HIST1H3G, HIST1H3J, HIST1H3H, HIST1H3F, HIST3H3, HIST1H3B	histone H3	histone H3	nucleus	protein	3WTP; 4U7T; 4TMP; 4UP0; 4UY4; 4QQ4; 4LXL; 4OUC; 3WKJ; 4MZF; 4MZH; 4O62; 4N4I; 3WA9; 3WAA; 4C1Q; 4LK9; 3W96; 3W97; 3W98; 3W99; 4L7X; 4L58; 3ZG6; 4GU0; 2M0O; 4GUS; 4GNE; 4GNF; 4GNG; 4I51; 4HON; 4GY5; 4HGA; 4BD3; 4FT2; 4H9R; 4H9S; 4H9N; 4H9O; 3V43; 4F4U; 4F56; 3UEE; 3UEF; 3U4S; 3UIG; 3UII; 3UIK; 3ASK; 3ASL; 3U5P; 4A7J; 3ZVY; 3RIG; 3RIY; 3U31; 3U3D; 4A0J; 4A0N; 3AVR; 3AYW; 3AZE; 3AZF; 3AZG; 3AZH; 3AZ…	P84243; Q6NXT2; Q71DI3; P68431
HIF-1-alpha	3091	HIF1A	HIF-1-alpha	hypoxia inducible factor 1, alpha subunit (basic helix-loop-helix transcription factor)	nucleus	transcription factor	1D7G;1H2K;1H2L;1H2M;1L3E;1L8C;1LM8;1LQB;2ILM;3HQR;3HQU;4AJY;4H6J	Q16665
HIPK2	28996	HIPK2	HIPK2	homeodomain interacting protein kinase 2; similar to homeodomain interacting protein kinase 2	nucleus	transcription regulator		Q9H2X6	2.7.11.1
histone H1	3024; 3009; 3006; 3007; 3008	HIST1H1A, HIST1H1B, HIST1H1C, HIST1H1D, HIST1H1E	histone H1	histone H1	nucleus	protein	3TZD; 2RHI	Q02539; P16401; P16403; P16402; P10412
HNF4-alpha	3172	HNF4A	HNF4-alpha	hepatocyte nuclear factor 4, alpha	nucleus	transcription factor	1PZL;3CBB;3FS1;4B7W;4IQR	P41235
HSF1	3297	HSF1	HSF1	heat shock transcription factor 1	nucleus	transcription factor	2LDU	Q00613
HSP90	3320; 3326	HSP90AA1, HSP90AB1	HSP90	heat shock protein	cytoplasm	protein	4CGQ; 4CGU; 4CGV; 4CGW; 4AIF; 3T0H; 3UQ3; 2L6J; 2YK9; 2YE7; 2YEE; 3Q6M; 3NMQ; 3PRY; 2XJJ; 3FWV; 2C2L; 1YC1; 1QZ2; 1BYQ	P07900; P08238
HSP27	3315	HSPB1	HSP27	heat shock 27kDa protein-like 2 pseudogene; heat shock 27kDa protein 1	cytoplasm	protein	3Q9P;3Q9Q;4MJH	P04792
RTK	3480; 1956; 2260; 2261; 2263; 2264; 5156; 5159; 3643; 3791; 2321; 2324; 1436; 1969; 3815; 4233; 4804; 7010	IGF1R, EGFR, FGFR1, FGFR3, FGFR2, FGFR4, PDGFRA, PDGFRB, INSR, KDR, FLT1, FLT4, CSF1R, EPHA2, KIT, MET, NGFR, TEK	IGF1R, EGFR, FGFR1, FGFR3, FGFR2, FGFR4, PDGFRA, PDGFRB, INSR, VEGFR2, VEGFR1, VEGFR3, CSF1R, EPHA2, c-kit, c-Met, NGFR, TEK	receptor tyrosine kinases	plasma membrane	kinase	4X3J; 4RIY; 4UXQ; 4RJ8; 4WUN; 4QQ5; 4QQC; 4QQJ; 4QQT; 4TYG; 4OGA; 2MET; 2MEU; 4LIQ; 4O3U; 4P2K; 2MFR; 2M59; 4LQM; 4LRM; 2M0B; 4K94; 2LZL; 4K33; 4K3J; 4KRM; 4KRP; 4IBM; 3VW8; 4J96; 4J97; 4J98; 4J99; 4BSJ; 4BSK; 4K0V; 4HVS; 4HW7; 3VO3; 3VRP; 3VRR; 2M20; 3W2P; 4I20; 4I22; 4I24; 3W11; 3W12; 3W13; 3W14; 4HJO; 4ASE; 3TT0; 2L6W; 4DKD; 3VJN; 3U6J; 3QWQ; 3VHE; 3P0Y; 3OJ2; 3OJM; 3S35; 2KSO; 3RI1; 2XIR; 3PO…	P08069; P00533; P11362; P22607; P21802; P22455; P16234; P09619; P06213; P35968; P17948; P35916; P07333; P29317; P10721; P08581; P08138; Q02763	2.7.10.1
IKK-beta	3551	IKBKB	IKK-beta	inhibitor of kappa light polypeptide gene enhancer in B-cells, kinase beta	cytoplasm	kinase	3BRT;3BRV;4E3C;4KIK	O14920	2.7.11.10
CytokineR	3598; 3597; 3563; 3581; 3561; 3560; 53833; 3559; 3575; 58985; 53832; 3594; 116379; 3570; 3595; 3590; 3572; 3566; 3568; 3587; 3588; 3601; 163702; 50615; 149233; 3459; 3454; 3455; 3460; 2690; 3953; 9180; 2057; 1439; 1438; 1441; 1271; 3563	IL13RA2, IL13RA1, ILl3RA, IL9R, IL2RG, IL2RB, IL20RB, IL2RA, IL7R, IL22RA1, IL20RA, IL12RB1, IL22RA2, IL6R, IL12RB2, IL11RA, IL6ST, IL4R, IL5RA, IL10RA, IL10RB, IL15RA, IL28RA, IL21R, IL23R, IFNGR1, IFNAR1, IFNAR2, IFNGR2, GHR, LEPR, OSMR, EPOR, CSF2RB, CSF2RA, CSF3R, CNTFR, IL3R	IL13RA2, IL13RA1, ILl3RA, IL9R, IL2RG, IL2RB, IL20RB, IL2RA, IL7R, IL22RA1, IL20RA, IL12RB1, IL22RA2, IL6R, IL12RB2, IL11RA, IL6ST, IL4R, IL5RA, IL10RA, IL10RB, IL15RA, IL28RA, IL21R, IL23R, IFNGR1, IFNAR1, IFNAR2, IFNGR2, GHR, LEPR, OSMR, EPOR, CSF2RB, CSF2RA, CSF3R, CNTFR, IL3R	cytokine receptors	plasma membrane	signaling receptor	4NZD; 2MV6; 4JZJ; 4PO6; 4HWB; 4GS7; 3VA2; 4DOH; 3V6O; 3UP1; 3QT2; 3S8W; 3S98; 3S9D; 3SE4; 3OG6; 3LQM; 3L5H; 3L5I; 3LB6; 3IU3; 3G9V	Q14627; P78552; P26951; Q01113; P31785; P14784; Q6UXL0; P01589; P16871; Q8N6P7; Q9UHF4; P42701; Q969J5; P08887; Q99665; Q14626; P40189; P24394; Q01344; Q13651; Q08334; Q13261; P40189; P24394; Q01344; Q13651; Q08334; Q13261; Q8IU57; Q9HBE5; Q5VWK5; P01589; P17181; P48551; P38484; P10912; P48357; Q99650; P19235; P32927; P15509; Q99062; P26992
ILK	3611	ILK	ILK	integrin-linked kinase	plasma membrane	kinase	2KBX;3F6Q;3IXE;3KMU;3KMW;3REP;4HI8;4HI9	Q13418	2.7.11.1
IMPDH	3614; 3615	IMPDH1, IMPDH2	IMPDH1, IMPDH2	inosine 5 monophosphate dehydrogenase	nucleus	transcription factor	1NF7; 1JCN	P20839; P12268	1.1.1.205
INSIG2	51141	INSIG2	INSIG2	insulin induced gene 2	cytoplasm	protein	4J82	Q9Y5U4
IRS1	3667	IRS1	IRS1	insulin receptor substrate 1	plasma membrane	kinase	1IRS;1K3A;1QQG;2Z8C	P35568
ITCH	83737	ITCH	Itch	E3 ubiquitin ligase	cytoplasm	kinase	2DMV;2KYK;2NQ3;2P4R;2YSF;3TUG	Q96J02	6.3.2.-
JAK	3716; 3717; 3718	JAK1, JAK2, JAK3	JAK1, JAK2, JAK3	janus kinase	cytoplasm	kinase	4QPS; 4C61; 4I6Q; 4L00; 4L01; 4IVA; 4BBF; 4FVQ; 4FVR; 4E6Q; 3UGC; 3PJC; 2XA4; 3LXL; 3EYG; 2W1I; 2B7A; 1YVJ	P23458; O60674; P52333	2.7.10.2
c-Jun	3725	JUN	c-Jun	jun oncogene	nucleus	transcription factor	1A02;1FOS;1JNM;1JUN;1S9K;1T2K	P05412
Ras	3845; 3265; 4893	KRAS, HRAS, NRAS	Ras	ras oncogene	plasma membrane	protein	4L9S; 4DLR; 3OIU; 3OIW; 3K9L; 3KKM; 3LO5; 2X1V; 3I3S; 3DDC; 3CON; 2RGB; 2RGC; 2RGG; 2QUZ; 2CE2; 2CLD; 1ZW6; 1XJ0; 1NVV; 1LF0; 1CTQ; 1LFD; 1JAH; 1AGP; 221P; 421P; 521P; 621P; 821P	P01112; P01111
LATS1	9113	LATS1	LATS1	large tumor suppressor kinase	cytoplasm	kinase		O95835	2.7.11.1
LIMK	3984; 3985	LIMK1, LIMK2	LIMK1, LIMK2	LIM domain kinase	cytoplasm	kinase	4TPT; 3S95; 1X6A	P53667; P53671	2.7.11.1
GPCR	1902; 23566; 2846; 57121; 9170; 10161; 1128; 1129; 2149	LPAR1, LPAR3, LPAR4, LPAR5, LPAR2, LPAR6, CHRM1, CHRM2, F2R	LPAR1, LPAR3, LPAR4, LPAR5, LPAR2, LPAR6, CHRM1, CHRM2, F2R	G-protein coupled receptors	plasma membrane	signaling receptor	4P0C; 4MQS; 3VW7; 3UON; 3LU9; 3HKI; 3BEF; 1NRN; 1NRO; 1NRR	Q92633; Q9UBY5; Q99677; Q9H1C0; Q9HBW0; P43657; P11229; P08172; P25116
Lipin-1	23175	LPIN1	Lipin-1	phosphatidate phosphatase lipin 1	cytoplasm	phosphatase		Q14693	3.1.3.4
MAF1	84232	MAF1	MAF1	repressor of RNA polymerase III transcription	nucleus	protein	3NR5	Q9H063
MEK	5604; 5605	MAP2K1, MAP2K2	MEK1, MEK2	mitogen-activated protein kinase kinase	cytoplasm	kinase	3WIG; 3W8Q; 3VVH; 3ZLW; 3ZLX; 3ZLY; 4H3Q; 4AN3; 3SLS; 3EQC; 1S9I	Q02750; P36507	2.7.12.2
MEKK3	4215	MAP3K3	MEKK3	mitogen-activated protein kinase kinase kinase 3	cytoplasm	kinase	2C60;2JRH;2O2V;2PPH	Q99759	2.7.11.25
ASK1	4217	MAP3K5	MEKK5	mitogen-activated protein kinase kinase kinase 5	cytoplasm	kinase	2CLQ;3VW6;4BF2;4BHN;4BIB;4BIC;4BID;4BIE	Q99683	2.7.11.25
TAK1	6885	MAP3K7	TAK1	mitogen-activated protein kinase kinase kinase 7	cytoplasm	kinase	2EVA;2YIY;4GS6;4L3P;4L52;4L53;4O91	O43318	2.7.11.25
NIK	9448	MAP4K4	MEKKK4	mitogen-activated protein kinase kinase kinase kinase 4	cytoplasm	kinase	4OBO;4OBP;4OBQ;4U43;4U44;4U45	O95819	2.7.11.1
ERK	5594; 5595	MAPK1, MAPK3	ERK-1, ERK-2	mitogen-activated protein kinase	cytoplasm	kinase	4QTA; 4QTB; 4O6E; 4IZ5; 4H3P; 4H3Q; 3D42; 3D44; 1PME	P28482; P27361	2.7.11.24
p38 MAPK	1432	MAPK14	MAPK14	mitogen-activated protein kinase 14	cytoplasm	kinase	1A9U;1BL6;1BL7;1BMK;1DI9;1IAN;1KV1;1KV2;1M7Q;1OUK;1OUY;1OVE;1OZ1;1R39;1R3C;1W7H;1W82;1W83;1W84;1WBN;1WBO;1WBS;1WBT;1WBV;1WBW;1WFC;1YQJ;1ZYJ;1ZZ2;1ZZL;2BAJ;2BAK;2BAL;2BAQ;2FSL;2FSM;2FSO;2FST;2GFS;2I0H;2LGC;2NPQ;2OKR;2ONL;2QD9;2RG5;2RG6;2Y8O;2YIS;2YIW;2YIX;2ZAZ;2ZB0;2ZB1;3BV2;3BV3;3BX5;3C5U;3CTQ;3D7Z;3D83;3DS6;3DT1;3E92;3E93;3FC1;3FI4;3FKL;3FKN;3FKO;3FL4;3FLN;3FLQ;3FLS;3FLW;3FLY;3FLZ;3FMH;3FMJ;3FMK…	Q16539	2.7.11.24
JNK	5599	MAPK8	JNK	mitogen-activated protein kinase 8	cytoplasm	kinase	1UKH;1UKI;2G01;2GMX;2H96;2NO3;2XRW;2XS0;3ELJ;3O17;3O2M;3PZE;3V3V;3VUD;3VUG;3VUH;3VUI;3VUK;3VUL;3VUM;4AWI;4E73;4G1W;4HYS;4HYU;4IZY;4L7F;4QTD	P45983	2.7.11.24
MDM2	4193	MDM2	Mdm2	Mdm2 p53 binding protein	cytoplasm	protein	1RV1;1T4E;1T4F;1YCR;1Z1M;2AXI;2C6A;2C6B;2F1Y;2FOP;2GV2;2HDP;2LZG;2M86;2RUH;2VJE;2VJF;3EQS;3G03;3IUX;3IWY;3JZK;3JZR;3JZS;3LBK;3LBL;3LNJ;3LNZ;3MQS;3TJ2;3TPX;3TU1;3V3B;3VBG;3VZV;3W69;4DIJ;4ERE;4ERF;4HBM;4HFZ;4HG7;4JV7;4JV9;4JVE;4JVR;4JWR;4MDN;4MDQ;4OAS;4OBA;4OCC;4ODE;4ODF;4OGN;4OGT;4OGV;4OQ3;4QO4;4UMN	Q00987	6.3.2.-
miR-200	406983; 406984	MIR200A, MIR200B		micro-RNA	cytoplasm	micro-RNA
miR-9	407046	MIR9		micro-RNA	cytoplasm	micro-RNA
Mre11-Rad50-Nbs1	4361; 4362; 10111; 4683	MRE11A, MRE11B, RAD50, NBN	MRE11A, RAD50, Nibrin	complex of Mre11-Rad50-Nbs1	nucleus	complex	3T1I	P49959; Q92878; O60934
MTORC2	2475; 253260	MTOR, RICTOR	mTOR, Rictor	mTORC2	cytoplasm	complex	4JSN; 4DRI; 2NPU	P42345; Q6R327	2.7.11.1
MTORC1	2475; 57521	MTOR, RPTOR	mTOR, Raptor	mTORC1	cytoplasm	complex	4DRI; 2NPU	P42345; Q8N122
Mad1	4084	MXD1	Mad1	MAX dimerization protein 1	nucleus	transcription factor	1E91;1G1E;1NLW;1PD7;1S5Q	Q05195
Myc	4609	MYC	Myc	v-myc myelocytomatosis viral oncogene homolog (avian)	nucleus	transcription factor	1A93;1EE4;1MV0;1NKP;2A93;2OR9	P01106
MYLK	340156; 4638; 85366; 91807	MYLK4, MYLK1, MYLK2, MYLK3	MYLK4, MYLK1, MYLK2, MYLK3	myosin light chain kinase	cytoplasm	kinase	2LV6; 3KF9; 2X4F; 2K0F; 2YR3; 2CQV	Q86YV6; Q15746; Q9H1R3; Q32MK0	2.7.11.1
NEDD4-1	4734	NEDD4	NEDD4	neural precursor cell expressed, developmentally down-regulated 4	cytoplasm	protein	2KPZ;2KQ0;2M3O;2XBB;2XBF;3B7Y;4BBN;4BE8;4N7F;4N7H	P46934	6.3.2.-
NEDD4-2	23327	NEDD4L	NEDD4L	neural precursor cell expressed, developmentally down-regulated 4-like	cytoplasm	protein	2LAJ;2LB2;2LTY;2MPT;2NSQ;2ONI;3JVZ;3JW0	Q96PU5	6.3.2.-
NFAT	4772; 4773	NFATC1, NFATC2	NFATC1, NFATC2	nuclear factor of activated T-cells	nucleus	transcription factor	3QRF; 2O93; 2AS5; 1S9K; 1OWR; 1P7H; 1PZU; 1A66; 1A02; 1NFA	O95644; Q13469
NFKB	4790; 5970	NFKB1, NFKB3	NFKB1, NFKB3	Nuclear Factor Of Kappa Light Polypeptide Gene Enhancer In B-Cells	nucleus	transcription factor	4KV1; 4KV4; 2LSP; 3QXY; 3RC0; 3GUT; 2O61; 2DBF; 1NFI; 1SVC; 1MDI; 1MDJ; 1MDK	P19838; Q04206
IkB-alpha	4792	NFKBIA	IkB-alpha	nuclear factor of kappa light polypeptide gene enhancer in B-cells inhibitor, alpha	cytoplasm	protein	1IKN;1NFI	P25963
eNOS	4846	NOS3	eNOS	nitric oxide synthase 3	cytoplasm	protein	1M9J;1M9K;1M9M;1M9Q;1M9R;1NIW;2LL7;2MG5;3EAH;3NOS;4D1O;4D1P	P29474	1.14.13.39
Notch	4851; 4853; 4854; 4855	NOTCH1, NOTCH2, NOTCH3, NOTCH4	Notch1, Notch2, Notch3, Notch4	Notch	plasma membrane	protein	4CUE; 4D0E; 4D0F; 4CUF; 3V79; 3NBN; 3L95; 3I08; 3ETO; 2OO4; 2HE0; 2F8X; 2F8Y; 1YYH; 1TOZ; 1PB5	P46531; Q04721; Q9UM47; Q99466
OXSR1	9943	OXSR1	OXSR1	oxidative-stress responsive 1	cytoplasm	kinase	2V3S;2VWI;3DAK	O95747	2.7.11.1
PAK-1	5058	PAK1	PAK-1	p21 protein (Cdc42/Rac)-activated kinase 1	cytoplasm	kinase	1F3M;1YHV;1YHW;1ZSG;2HY8;2QME;3DVP;3FXZ;3FY0;3Q4Z;3Q52;3Q53;4DAW;4EQC;4O0R;4O0T;4P90	Q13153	2.7.11.1
PEPCK	5106	PCK2	PEPCK	phosphoenolpyruvate carboxykinase 2 (mitochondrial)	cytoplasm	protein		Q16822	4.1.1.32
PCNA	5111	PCNA	PCNA	proliferating cell nuclear antigen	nucleus	protein	1AXC;1U76;1U7B;1UL1;1VYJ;1VYM;1W60;2ZVK;2ZVL;2ZVM;3P87;3TBL;3VKX;3WGW	P12004
PDCD4	27250	PDCD4	PDCD4	programmed cell death 4 (neoplastic transformation inhibitor)	cytoplasm	protein	2GGF;2KZT;2RG8;2ZU6;3EIJ	Q53EL6
PDK1	5163	PDK1	PDK1	pyruvate dehydrogenase kinase, isozyme 1	cytoplasm	kinase	2Q8F;2Q8G;2Q8H	Q15118	2.7.11.2
PFKFB2	5208	PFKFB2	PFKFB2	6-phosphofructo-2-kinase/fructose-2,6-biphosphatase 2	cytoplasm	protein		O60825	2.7.1.105; 3.1.3.46
PHLDA3	23612	PHLDA3	PHLDA3	pleckstrin homology-like domain, family A, member 3	plasma membrane	protein		Q9Y5J5
PHLPP1	23239	PHLPP1	PHLPP1	PH domain and leucine rich repeat protein phosphatase 1	plasma membrane	phosphatase		O60346	3.1.3.16
VPS34	5289	PIK3C3	VPS34	phosphoinositide-3-kinase, class 3	cytoplasm	kinase	3IHY;3LS8;4OYS;4PH4	Q8NEB9	2.7.1.137
PI3K	5290; 5291; 5293; 5294; 5295; 5296	PIK3CA, PIK3CB, PIK3CD, PIK3CG, PIK3R1, PIK3R2	p110-alpha, p110-beta, p110-delta, p110-gamma, p85-alpha, p85-beta	phosphoinositide-3-kinase	cytoplasm	kinase	4JPS; 3O5Z; 2XS6; 3MTT; 3I5R; 3HHM; 2ENQ; 2V1Y; 2IUH; 1H9O; 1E8Y; 1A0N; 1AZG; 1PBW	P42336; P42338; O00329; P48736; P27986; O00459	2.7.1.153; 2.7.11.1
PKM	5315	PKM2	PKM2	similar to Pyruvate kinase, isozymes M1/M2 (Pyruvate kinase muscle isozyme)	cytoplasm	kinase	1T5A;1ZJH;3BJF;3BJT;3G2G;3GQY;3GR4;3H6O;3ME3;3SRD;3SRF;3SRH;3U2Z;4B2D;4FXF;4FXJ;4G1N;4JPG	P14618	2.7.1.40
CKIP-1	51177	PLEKHO1	CKIP-1	casein kinase-2 interacting protein-1	plasma membrane	protein	3AA1	Q53GL0
PLK3	1263	PLK3	PLK3	polo-like kinase 3	cytoplasm	kinase	4B6L	Q9H4B4	2.7.11.21
Noxa	5366	PMAIP1	Noxa	phorbol-12-myristate-13-acetate-induced protein 1	cytoplasm	protein	3MQP	Q13794
PML	5371	PML	PML	promyelocytic leukemia; similar to promyelocytic leukemia protein isoform 1	nucleus	transcription regulator	1BOR;2MVW	P29590
SKAR	84271	POLDIP3	SKAR	Polymerase (DNA-Directed), Delta Interacting Protein	nucleus	protein		Q9BY77
RNA Pol I	25885; 84172	POLR1A, POLR1B	RNA polymerase I	RNA polymerase I	nucleus	protein		O95602; Q9H9Y6	2.7.7.6
RNA Pol III	11128; 55703	POLR3A, POLR3B	RNA polymerase III	RNA polymerase III	nucleus	protein		O14802; Q9NW08	2.7.7.6
POT1	25913	POT1	POT1	POT1 protection of telomeres 1 homolog (S. pombe)	nucleus	protein	1XJV;3KJO;3KJP	Q9NUX5
PPARalpha	5465	PPARA	PPAR-alpha	peroxisome proliferator-activated receptor alpha	nucleus	transcription factor	1I7G;1K7L;1KKQ;2NPA;2P54;2REW;2ZNN;3ET1;3FEI;3G8I;3KDT;3KDU;3SP6;3VI8;4BCR	Q07869
PGC-1alpha	10891	PPARGC1A	PGC-1alpha	peroxisome proliferator-activated receptor gamma, coactivator 1 alpha	nucleus	transcription regulator	1XB7;3B1M;3CS8;3D24;3U9Q;3V9T;3V9V;4QJR;4QK4	Q9UBK2
IP6K	9677	PPIP5K1	IP6K	histidine acid phosphatase domain containing 2A	cytoplasm	protein		Q6PFW1	2.7.4.21; 2.7.4.24
Wip1	8493	PPM1D	Wip1	protein phosphatase 1D magnesium-dependent, delta isoform	nucleus	phosphatase		O15297	3.1.3.16
PP2A	5515; 5516; 5518; 5519	PPP2CA, PPP2CB, PPP2R1A, PPP2R1B	PP2A-alpha, PP2A-beta	Protein Phosphatase 2	cytoplasm	phosphatase	4LAC; 4I5L; 4IYP; 3FGA; 3C5W; 2IE3	P67775; P62714; P30153; P30154	3.1.3.16
Calcineurin	5530; 5534	PPP3CA, PPP3R1	Calcineurin	Protein Phosphatase 3	cytoplasm	phosphatase	4F0Z; 2W73; 2R28; 1AUI	Q08209; P63098	3.1.3.16
AMPK	5562; 5564; 5563; 5565; 5571; 51422	PRKAA1, PRKAB1, PRKAA2, PRKAB2, PRKAG1, PRKAG2	AMPK	AMP-Activated Kinase	cytoplasm	kinase	4RED; 4RER; 4CFE; 2LTU; 2V8Q; 2UV4; 2H6D; 2F15	Q13131; Q9Y478; P54646;O43741; P54619; Q9UGJ0	2.7.11.1; 2.7.11.27; 2.7.11.31; 2.7.11.26
PKC	5578; 5579	PRKCA, PRKCB	PKC-alpha, PKC-beta	protein kinase C	cytoplasm	kinase	4RA4; 4DNL; 3IW4; 2ELI; 2I0E	P17252; P05771	2.7.11.13
PKD1	5587	PRKD1	PKD1	protein kinase D1	cytoplasm	kinase		Q15139	2.7.11.13
DNA-PK	5591	PRKDC	DNA-PK	DNA-dependent protein kinase	nucleus	kinase		P78527	2.7.11.1
PTEN	5728	PTEN	PTEN	phosphatase and tensin homolog	cytoplasm	phosphatase	1D5R;2KYL;4O1V	P60484	3.1.3.16; 3.1.3.48; 3.1.3.67
FAK	5747	PTK2	FADK 1	PTK2 protein tyrosine kinase 2	plasma membrane	kinase	1K04;1K05;1MP8;1OW6;1OW7;1OW8;2ETM;2IJM;2RA7;3B71;3BZ3;3PXK;3S9O;4EBV;4EBW;4GU6;4GU9;4I4E;4I4F;4K8A;4K9Y;4KAB;4KAO;4NY0;4Q9S	Q05397	2.7.10.2
Paxillin	5829	PXN	Paxillin	paxillin	cytoplasm	protein	1KKY;1KL0;1OW6;1OW7;1OW8;2K2R;2O9V;2VZD;2VZG;2VZI;3GM1;3PY7;3RQE;3RQF;3RQG;3U3F;4EDN;4R32	P49023
Rac1	5879	RAC1	Rac1	ras-related C3 botulinum toxin substrate 1 (rho family, small GTP binding protein Rac1)	plasma membrane	protein	1E96;1FOE;1G4U;1HE1;1HH4;1I4D;1I4L;1I4T;1MH1;1RYF;1RYH;2FJU;2H7V;2NZ8;2P2L;2RMK;2VRW;2WKP;2WKQ;2WKR;2YIN;3B13;3BJI;3RYT;3SBD;3SBE;3SU8;3SUA;3TH5;4GZL;4GZM	P63000
RAD51	5888	RAD51	RAD51	RAD51	nucleus	protein	1B22;1N0W	Q06609
RAR-alpha	5914	RARA	RAR-alpha	retinoic acid receptor, alpha	nucleus	signaling receptor	1DKF;1DSZ;3A9E;3KMR;3KMZ;4DQM	P10276
RASSF1	11186	RASSF1	RASSF1	Ras association (RalGDS/AF-6) domain family member 1	cytoplasm	protein	2KZU	Q9NS23
Rb	5925	RB1	Rb	retinoblastoma 1	nucleus	transcription factor	1AD6;1GH6;1GUX;1H25;1N4M;1O9K;1PJM;2AZE;2QDJ;2R7G;3N5U;3POM;4ELJ;4ELL	P06400
Rheb	6009	RHEB	Rheb	Ras homolog enriched in brain	cytoplasm	protein	1XTQ;1XTR;1XTS;3SEA;3T5G	Q15382
RhoA	387	RHOA	RhoA	ras homolog gene family, member A	cytoplasm	protein	1A2B;1CC0;1CXZ;1DPF;1FTN;1KMQ;1LB1;1OW3;1S1C;1TX4;1X86;1XCG;2RGN;3KZ1;3LW8;3LWN;3LXR;3MSX;3T06;4D0N	P61586
RIP	8737	RIPK1	RIP	receptor (TNFRSF)-interacting serine-threonine kinase 1	cytoplasm	kinase	4ITH;4ITI;4ITJ;4NEU	Q13546	2.7.11.1
ROCK	6093; 9475	ROCK1, ROCK2	ROCK1, ROCK2	Rho-Associated, Coiled-Coil Containing Protein Kinase	cytoplasm	kinase	4L2W; 4L6Q; 3V8S; 3O0Z; 1S1C	Q13464; O75116	2.7.11.1
RPS6	6194	RPS6	RPS6	ribosomal protein S6 pseudogene 25; ribosomal protein S6; ribosomal protein S6 pseudogene 1	cytoplasm	protein	3J3A	P62753
p90-RSK	6195; 6196; 6197	RPS6KA1, RPS6KA2, RPS6KA3	p90-RSK1, p90-RSK2, p90-RSK3	ribosomal protein S6 kinase	cytoplasm	kinase	4NIF; 4NW6; 4JG8; 4H3P; 3TEI; 4D9U; 2WNT; 2Z7R	Q15418; Q15349; P51812	2.7.11.1
p70-S6K	6198; 6199	RPS6KB1, RPS6KB2	p70-S6K1, p70-S6K12	ribosomal protein S6 kinase	cytoplasm	kinase	3WF7; 4L3L	P23443; Q9UBS0	2.7.11.1
Rag-Ragulator	10670; 10325; 55004; 28956; 8649; 389541; 10542	RRAGA, RRAGB, LAMTOR1, LAMTOR2, LAMTOR3, LAMTOR4, LAMTOR5	Rag, LAMTOR1, LAMTOR2, LAMTOR3, LAMTOR4, LAMTOR5	complex of Rag, LAMTOR1, LAMTOR2, LAMTOR3, LAMTOR4, LAMTOR5	cytoplasm	complex	3MSH; 3CPT; 2ZL1	Q7L523; Q5VZM2; Q6IAA8; Q9Y2Q5; Q9UHA4; Q0VGL1; O43504
TIF-IA	54700	RRN3	TIF-IA	RRN3 RNA polymerase I transcription factor	nucleus	transcription factor		Q9NYV6
ENaC	6337; 6338; 6339; 6340	SCNN1A, SCNN1B, SCNN1D, SCNN1G	SCNN1A, SCNN1B, SCNN1D, SCNN1G	sodium channel, non-voltage-gated	plasma membrane	protein	2M3O	P37088; P51168; P51172; P51170
PAI-1	5054	SERPINE1	PAI-1	serpin peptidase inhibitor, clade E (nexin, plasminogen activator inhibitor type 1), member 1	plasma membrane	protein	1A7C;1B3K;1C5G;1DB2;1DVM;1DVN;1LJ5;1OC0;3CVM;3EOX;3PB1;3Q02;3Q03;3R4L;3UT3;4AQH;4G8O;4G8R;4IC0;9PAI	P05121
Sestrin	27244; 83667; 143686	SESN1, SESN2, SESN3	Sestrin1, Sestrin2, Sestrin3	P53-Regulated Protein PA26	nucleus	protein		Q9Y6P5; P58004; P58005
SGK	6446;10110; 23678	SGK1, SGK2, SGK3	SGK1, SGK2, SGK3	serum/glucocorticoid regulated kinase	cytoplasm	kinase	2R5T	O00141; Q9HBY8; Q96BR1	2.7.11.1
Siah-1	6477	SIAH1	Siah-1	siah E3 ubiquitin protein ligase 1	cytoplasm	protein	2A25;4C9Z;4CA1;4I7B;4I7C;4I7D	Q8IUQ4	6.3.2.-
SIK2	23235	SIK2	SIK2	salt-inducible kinase 2	cytoplasm	kinase		Q9H0K1	2.7.11.1
SIRT1	23411	SIRT1	Sirtuin-1	NAD-Dependent Deacetylase Sirtuin-1	nucleus	transcription regulator	4I5I;4IF6;4IG9;4KXQ	Q96EB6	3.5.1.-
SCF/Skp2	6500; 6502; 8454	SKP1, SKP2, CUL1	SCF, Skp2, Cul1	ubiquitin ligase complex	cytoplasm	complex	4P5O; 4F52; 3TDU; 2OVR; 2AST; 1LDJ; 1LDK; 1FS1; 1FS2	P63208; Q13309; Q13616
NKCC	6558; 6557	SLC12A1, SLC12A2	NKCC1, NKCC2	solute carrier family 12 (sodium/potassium/chloride transporter)	plasma membrane	protein		P55011; Q13621
KCC	6560; 9990; 10723	SLC12A4, SLC12A6, SLC12A7	KCC1, KCC3, KCC4	solute carrier family 12 (potassium/chloride transporter)	plasma membrane	protein		Q9UP95; Q9UHW9; Q9Y666
NHE1	6548	SLC9A1	NHE1	solute carrier family 9 (sodium/hydrogen exchanger), member 1	plasma membrane	protein	1Y4E;2BEC;2E30;2HTG;2KBV;2L0E;2MDF;2YGG	P19634
SMAD3/4	4088; 4089	SMAD3, SMAD4	Smad3, Smad4	smad	nucleus	transcription factor	2LAJ; 2LB2; 1OZJ; 1MJS; 1DD1; 1MHD; 1YGS	P84022; Q13485
Snail	6615	SNAI1	Snail	snail family zinc finger 1	nucleus	transcription factor	2Y48;3W5K	O95863
Slug	6591	SNAI2	Slug	snail family zinc finger 2	nucleus	transcription factor		O43623
MnSOD	6648	SOD2	MnSOD	superoxide dismutase 2, mitochondrial	cytoplasm	protein	1AP5;1AP6;1EM1;1JA8;1LUV;1LUW;1MSD;1N0J;1N0N;1PL4;1PM9;1QNM;1SZX;1VAR;1XDC;1XIL;1ZSP;1ZTE;1ZUQ;2ADP;2ADQ;2GDS;2P4K;2QKA;2QKC;3C3S;3C3T	P04179	1.15.1.1
p62	8878	SQSTM1	p62	sequestosome 1	cytoplasm	protein	1Q02;2JY7;2JY8;2K0B;2KNV;4MJS	Q13501
Src	6714	SRC	Src	v-src sarcoma (Schmidt-Ruppin A-2) viral oncogene homolog (avian)	cytoplasm	kinase	1A07;1A08;1A09;1A1A;1A1B;1A1C;1A1E;1FMK;1HCS;1HCT;1KSW;1O41;1O42;1O43;1O44;1O45;1O46;1O47;1O48;1O49;1O4A;1O4B;1O4C;1O4D;1O4E;1O4F;1O4G;1O4H;1O4I;1O4J;1O4K;1O4L;1O4M;1O4N;1O4O;1O4P;1O4Q;1O4R;1SHD;1Y57;1YI6;1YOJ;1YOL;1YOM;2BDF;2BDJ;2H8H;2SRC;3VRO;3ZMP;3ZMQ;4F59;4F5A;4F5B;4HXJ;4K11;4MXO;4MXX;4MXY;4MXZ	P12931	2.7.10.2
SREBP1	6720	SREBF1	SREBP1	sterol regulatory element binding transcription factor 1	nucleus	transcription factor	1AM9	P36956
STAT3	6774	STAT3	Stat3	signal transducer and activator of transcription 3 (acute-phase response factor)	nucleus	transcription factor		P40763
LKB1	6794	STK11	STK11	serine/threonine kinase 11	cytoplasm	kinase	2WTK	Q15831	2.7.11.1
MST-2	6788	STK3	MST-2	serine/threonine kinase 3	cytoplasm	kinase	4HKD;4L0N;4LG4;4LGD;4OH9	Q13188	2.7.11.1
MST-1	6789	STK4	MST-1	serine/threonine kinase 4	cytoplasm	kinase	2JO8;3COM;4NR2;4OH8	Q13043	2.7.11.1
Tal1	6886	TAL1	Tal1	T-cell acute lymphocytic leukemia 1	nucleus	transcription factor	2YPA;2YPB	P17542
TBK1	29110	TBK1	TBK1	TANK-binding kinase 1	cytoplasm	kinase	4EFO;4EUT;4EUU;4IM0;4IM2;4IM3;4IW0;4IWO;4IWP;4IWQ	Q9UHD2	2.7.11.1
TRF1	7013	TERF1	TRF1	similar to telomeric repeat binding factor	nucleus	protein	1BA5;1H6O;1ITY;1IV6;1W0T;3BQO;3L82	P54274
TRF2	7014	TERF2	TRF2	telomeric repeat binding factor 2	nucleus	protein	1H6P;1VF9;1VFC;1W0U;1XG1;3BU8;3BUA;3K6G;3SJM;4M7C	Q15554
TERT	7015	TERT	hTERT	telomerase reverse transcriptase	nucleus	protein	2BCK;4B18;4MNQ	O14746	2.7.7.49
TFEB	7942	TFEB	TFEB	transcription factor EB	nucleus	transcription factor		P19484
TGFbeta	7040	TGFB1	TGF-beta-1	transforming growth factor, beta 1	extracellular	protein	1KLA;1KLC;1KLD;3KFD;4KV5	P01137
TGFBR1	7046	TGFBR1	TGFBR1	transforming growth factor, beta receptor 1	plasma membrane	kinase	1B6C;1IAS;1PY5;1RW8;1TBI;1VJY;2L5S;2PJY;2WOT;2WOU;2X7O;3FAA;3GXL;3HMM;3KCF;3KFD;3TZM	P36897	2.7.11.30
THBS1	7057	THBS1	Thrombospondin 1	thrombospondin 1	extracellular	protein	1LSL;1UX6;1Z78;1ZA4;2ERF;2ES3;2OUH;2OUJ;3R6B	P07996
Tiam1	7074	TIAM1	Tiam1	T-cell lymphoma invasion and metastasis 1	cytoplasm	protein	2D8I;3KZD;3KZE;4GVC;4GVD;4K2O;4K2P	Q13009
RANK	8792	TNFRSF11A	RANK	tumor necrosis factor receptor superfamily, member 11a, NFKB activator	plasma membrane	signaling receptor	1LB5	Q9Y6Q6
TNF-R	7132	TNFRSF1A	TNF-R	tumor necrosis factor receptor superfamily, member 1A	plasma membrane	signaling receptor	1EXT;1FT4;1ICH;1NCF;1TNR	P19438
TRAIL	8743	TNFSF10	TRAIL	tumor necrosis factor (ligand) superfamily, member 10	extracellular	protein	1D0G;1D2Q;1D4V;1DG6;1DU3;4N90	P50591
p53	7157	TP53	p53	tumor protein p53	nucleus	transcription factor	1A1U;1AIE;1C26;1DT7;1GZH;1H26;1HS5;1JSP;1KZY;1MA3;1OLG;1OLH;1PES;1PET;1SAE;1SAF;1SAK;1SAL;1TSR;1TUP;1UOL;1XQH;1YC5;1YCQ;1YCR;1YCS;2AC0;2ADY;2AHI;2ATA;2B3G;2BIM;2BIN;2BIO;2BIP;2BIQ;2F1X;2FEJ;2FOJ;2FOO;2GS0;2H1L;2H2D;2H2F;2H4F;2H4H;2H4J;2H59;2J0Z;2J10;2J11;2J1W;2J1X;2J1Y;2J1Z;2J20;2J21;2K8F;2L14;2LY4;2MEJ;2OCJ;2PCX;2RUK;2VUK;2WGX;2X0U;2X0V;2X0W;2XWR;2YBG;2YDR;2Z5S;2Z5T;3D05;3D06;3D07;3D08;3D09;3D0A…	P04637
p73	7161	TP73	p73	tumor protein p73	nucleus	transcription factor	1COK;1DXS;2KBY;2WQI;2WQJ;2WTT;2XWC;3VD0;3VD1;3VD2;4A63;4G82;4G83;4GUO;4GUQ	O15350
TRADD	8717	TRADD	TRADD	TNFRSF1A-associated via death domain	cytoplasm	protein	1F2H;1F3V	Q15628
TRAF2	7186	TRAF2	TRAF2	TNF receptor-associated factor 2	cytoplasm	protein	1CA4;1CA9;1CZY;1CZZ;1D00;1D01;1D0A;1D0J;1F3V;1QSC;3KNV;3M06;3M0A;3M0D	Q12933	6.3.2.-
TRAF6	7189	TRAF6	TRAF6	TNF receptor-associated factor 6	cytoplasm	protein	1LB4;1LB5;1LB6;2ECI;2JMD;3HCS;3HCT;3HCU	Q9Y4K3	6.3.2.-
TRIB3	57761	TRIB3	TRIB3	tribbles homolog 3 (Drosophila)	nucleus	transcription regulator		Q96RU7
RFP	5987	TRIM27	RFP	tripartite motif-containing 27	cytoplasm	kinase		P14373	6.3.2.-
TSC1	7248	TSC1	TSC1	tuberous sclerosis 1	cytoplasm	protein		Q92574
TSC2	7249	TSC2	TSC2	tuberous sclerosis 2	cytoplasm	protein		P49815
Twist	7291	TWIST	Twist	twist family bHLH transcription factor	nucleus	transcription factor	2MJV	Q15672
Ulk1	8408	ULK1	Ulk1	unc-51-like kinase 1	cytoplasm	kinase	4WNO	O75385	2.7.11.1
USP4	7375	USP4	USP4	ubiquitin specific peptidase 4 (proto-oncogene)	cytoplasm	protein	2Y6E	Q13107	3.4.19.12
Vav	7409; 7410; 10451	VAV1, VAV2, VAV3	Vav1, Vav2, Vav3	vav guanine nucleotide exchange factor	cytoplasm	protein	4ROJ; 2MC1; 2LNW; 3KY9; 2ROR; 3BJI; 2DLZ; 2DM1; 2D86	P15498; P52735; Q9UKW4
VEGF	7422; 7423	VEGFA, VEGFB	VEGFA, VEGFB	vascular endothelial growth factor	extracellular	protein	4GLS; 4DEQ; 3V2A; 2VWE; 2C7W; 1MJV; 1MKG; 1MKK; 1KMX	P15692; P49765
VHL	7428	VHL	pVHL	von Hippel-Lindau tumor suppressor, E3 ubiquitin protein ligase	cytoplasm	protein	1LM8;1LQB;1VCB;3ZRC;3ZRF;3ZTC;3ZTD;3ZUN;4AJY;4AWJ;4B95;4B9K;4BKS;4BKT;4W9C;4W9D;4W9E;4W9F;4W9G;4W9H;4W9I;4W9J;4W9K;4W9L	P40337
Vimentin	7431	VIM	Vimentin	vimentin	cytoplasm	protein	1GK4;1GK6;1GK7;3G1E;3KLT;3S4R;3SSU;3SWK;3TRT;3UF1;4MCY;4MCZ;4MD0;4MD5;4MDI;4MDJ	P08670
Wee1	7465	WEE1	Wee1	WEE1 G2 checkpoint kinase	nucleus	kinase	1X8B;2IN6;2IO6;2Z2W;3BI6;3BIZ;3CQE;3CR0	P30291	2.7.10.2
WNK1	65125	WNK1	WNK1	itchy E3 ubiquitin protein ligase homolog (mouse)	cytoplasm	protein	4PWN	Q9H4A3	2.7.11.1
Wnt	7471; 7472; 7473; 54361	WNT1, WNT2, WNT3, WNT4	Wnt1, Wnt2, Wnt3, Wnt4	wingless-type MMTV integration site family	extracellular	protein		P04628; P09544; P56703; P56705
WWP2	11060	WWP2	WWP2	WW domain containing E3 ubiquitin protein ligase 2	cytoplasm	protein		O00308	6.3.2.-
XIAP	331	XIAP	XIAP	X-linked inhibitor of apoptosis	cytoplasm	protein	1C9Q;1F9X;1G3F;1G73;1I3O;1I4O;1I51;1KMC;1NW9;1TFQ;1TFT;2ECG;2JK7;2KNA;2OPY;2OPZ;2POI;2POP;2QRA;2VSL;3CLX;3CM2;3CM7;3EYL;3G76;3HL5;3UW4;3UW5;4EC4;4HY0;4IC2;4IC3;4J3Y;4J44;4J45;4J46;4J47;4J48;4KJU;4KJV;4KMP;4MTZ	P98170	6.3.2.-
YAP1	10413	YAP1	YAP1	Yes-associated protein 1, 65kDa	nucleus	transcription regulator	1JMQ;1K5R;1K9Q;1K9R;2LAW;2LAX;2LAY;2LTV;2LTW;3KYS;3MHR	P46937
14-3-3	7534	YWHAZ	14-3-3 zeta	tyrosine 3-monooxygenase/tryptophan 5-monooxygenase activation protein, zeta polypeptide	cytoplasm	protein	1IB1;1QJA;1QJB;2C1J;2C1N;2O02;2WH0;3CU8;3NKX;3RDH;4BG6;4FJ3;4HKC;4IHL;4N7G;4N7Y;4N84	P63104
YY1	7528	YY1	YY1	YY1 transcription factor	nucleus	transcription factor	1UBD;1ZNM;4C5I	P25490
Miz-1	7709	ZBTB17	Miz-1	zinc finger and BTB domain containing 17	nucleus	transcription factor	2LVR;2LVT;2LVU;2M0D;2M0E;2M0F;2Q81;3M52	Q13105
Zeb1	6935	ZEB1	Zeb1	zinc finger E-box binding homeobox 1	nucleus	transcription factor	2e+19	P37275
Zeb2	9839	ZEB2	Zeb2	zinc finger E-box binding homeobox 2	nucleus	transcription factor	2DA7	O60315
Actin cytoskeleton	0					process
Angiogenesis	0					process
Apoptosis	0					process
Autophagy	0					process
Blood cell development	0					process
Cell cycle progression	0					process
Cell survival	0					process
DNA repair	0					process
Epigenetic regulation	0					process
Genetic Stability	0					process
GTP biosynthesis	0					process
Ion transport	0					process
Metabolism	0					process
Metastasis	0					process
Protein synthesis	0					process
Regulation of gene expression	0					process
Ribosomal RNA synthesis	0					process
